# 1 **Modulation of the primary auditory thalamus when recognising** 2 **speech with background noise**

3 Abbreviated Title: vMGB modulation for speech in noise recognition

4 Paul Glad Mihai<sup>1,2</sup>, Nadja Tschentscher<sup>3</sup>, Katharina von Kriegstein<sup>1</sup>

5 <sup>1</sup>Chair of Cognitive and Clinical Neuroscience, Faculty of Psychology, Technische Universität Dresden, 01187  
6 Dresden, Germany

7 <sup>2</sup>Max Planck Institute for Cognitive and Brain Sciences, 4103 Leipzig, Germany

8 <sup>3</sup>Research Unit Biological Psychology, Department of Psychology, Ludwig-Maximilians-University Munich,  
9 80802 Munich, Germany

10 Corresponding author: Katharina von Kriegstein, [katharina.von\\_kriegstein@tu-dresden.de](mailto:katharina.von_kriegstein@tu-dresden.de)

11 Number of pages: 49

12 Number of figures: 6

13 Number of tables: 1

14 Number of words Abstract: 247

15 Number of words Introduction: 649

16 Number of words Discussion: 1475

17 Conflict of Interest Statement: The authors declare no competing financial interests.

18 Acknowledgements: The study was funded by the European Research Council ERC  
19 Consolidator Grant SENSOCOM (647051) and the Max Planck Society.

## 20 Abstract

21 Recognising speech in background noise is a strenuous daily activity, yet most humans can  
22 master it. An explanation of how the human brain deals with such sensory uncertainty during  
23 speech recognition is to-date missing. Previous work has shown that recognition of speech  
24 without background noise involves modulation of the auditory thalamus (medial geniculate  
25 body, MGB): There are higher responses in left MGB for speech recognition tasks that require  
26 tracking of fast-varying stimulus properties in contrast to relatively constant stimulus  
27 properties (e.g., speaker identity tasks) despite the same stimulus input. Here we tested the  
28 hypotheses that (i) this task-dependent modulation for speech recognition increases in  
29 parallel with the sensory uncertainty in the speech signal, i.e., the amount of background  
30 noise and that (ii) this increase is present in the ventral MGB, which corresponds to the  
31 primary sensory part of the auditory thalamus. In accordance with our hypothesis, we  
32 show—by using ultra-high-resolution functional magnetic resonance imaging in human  
33 participants—that the task-dependent modulation of the left vMGB for speech is particularly  
34 strong when recognizing speech in noisy listening conditions in contrast to situations where  
35 the speech signal is clear. Exploratory analyses showed that this finding was specific to the  
36 left vMGB; it was not present in the right vMGB or the midbrain structure of the auditory  
37 pathway (left inferior colliculus, IC). The results imply that speech in noise recognition is  
38 supported by modifications at the level of the subcortical sensory pathway providing driving  
39 input to the auditory cortex.

## 40 Significance Statement

41 Speech recognition in noisy environments is a challenging everyday task. One reason why  
42 humans can master this task is the recruitment of additional cognitive resources as reflected  
43 in recruitment of non-language cerebral cortex areas. Here, we show that also modulation in  
44 the primary sensory pathway is specifically involved in speech in noise recognition. We  
45 found that the left primary sensory thalamus (ventral medial geniculate body, vMGB) is more  
46 involved when recognizing speech signals as opposed to a control task (speaker identity  
47 recognition) when heard in background noise vs. when the noise was absent. This finding  
48 implies that the brain optimises sensory processing in subcortical sensory pathway  
49 structures in a task-specific manner to deal with speech recognition in noisy environments.

50

51 Author contributions: PGM: collected data, analysed data, interpreted results, wrote the  
52 manuscript, edited the manuscript. NT: conceptualised experiment, programmed  
53 experiment, edited the manuscript. KvK: conceptualised experiment, interpreted results,  
54 wrote the manuscript, edited the manuscript.

## 55 **1. Introduction**

56 Roaring engines, the hammering from a construction site, the chit-chat of many children in a  
57 classroom are just some examples of background noises which continuously accompany us.  
58 Nevertheless, humans have a remarkable ability to hear and understand the conversation  
59 partner, even under these severe listening conditions (Cherry, 1953) .

60

61 Understanding speech in noise is a complex task that involves both sensory and cognitive

62 processes (Moore et al., 1985; Bregman, 1994; Best et al., 2007; Sayles and Winter, 2008;  
63 Shinn-Cunningham and Best, 2008; Song et al., 2010; Adank, 2012; Bronkhorst, 2015; Peelle,  
64 2018; Alavash et al., 2019). However, a more mechanistic explanation of why the human brain  
65 masters speech recognition in noise relatively well is missing. Such explanation could  
66 advance the understanding of difficulties with speech-in-noise perception in several clinical  
67 populations such as age-related hearing impairment (Schoof and Rosen, 2016), autism  
68 spectrum disorder (Alcántara et al., 2004), auditory processing disorder (Iliadou et al., 2017),  
69 or developmental dyslexia (Chandrasekaran et al., 2009; Ziegler et al., 2009). Furthermore, a  
70 more mechanistic understanding of speech-in-noise recognition might also trigger new  
71 insight on why artificial speech recognition systems still have difficulties with noisy  
72 situations (Scharenborg, 2007; Gupta et al., 2016).

73  
74 One mechanistic account of brain function that attempts to explain how the human brain  
75 deals with uncertainty in the stimulus input is the Bayesian brain hypothesis. It assumes that  
76 the brain represents information probabilistically and uses an internal generative model and  
77 predictive coding for the most effective processing of sensory input (Knill and Pouget, 2004;  
78 Friston, 2005; Kiebel et al., 2008; Friston and Kiebel, 2009). Such type of processing has the  
79 potential to explain why the human brain is robust to sensory uncertainty, e.g., when  
80 recognising speech despite noise in the speech signal (Srinivasan et al., 1982; Knill and  
81 Pouget, 2004). Although predictive coding is often discussed in the context of cerebral cortex  
82 organization (Hesselmann et al., 2010; Shipp et al., 2013), it may also be a governing principle  
83 of the interactions between cerebral cortex and subcortical sensory pathway structures

84 (Mumford, 1992; von Kriegstein et al., 2008; Huang and Rao, 2011; Bastos et al., 2012; Adams  
85 et al., 2013; Seth and Friston, 2016).

86 In humans, responses in the auditory sensory thalamus (medial geniculate body, MGB) are  
87 higher for speech tasks (that emphasise recognition of fast-varying speech properties) in  
88 contrast to control tasks (that require recognition of relatively constant properties of the  
89 speech signal, such as the speaker identity or the sound intensity level). This response  
90 difference holds even if the stimulus input is the same (von Kriegstein et al., 2008; Díaz et al.,  
91 2012), indicating that the effect is dependent on the specific tasks. We will therefore call it  
92 task-dependent modulation in the following. The task-dependent modulation seems to be  
93 behaviourally relevant for speech recognition: performance level in auditory speech  
94 recognition positively correlates with the amount of task-dependent modulation in the MGB  
95 of the left hemisphere (von Kriegstein et al., 2008; Mihai et al., 2019). This behaviourally  
96 relevant task-dependent modulation was located in the ventral part of the MGB (vMGB),  
97 which is the primary subsection of the MGB (Mihai et al., 2019). These findings have been  
98 interpreted by extending the Bayesian brain hypothesis to cortico-subcortical interactions:  
99 cerebral cortex areas provide dynamic predictions about the incoming sensory input to the  
100 sensory thalamus to optimally encode the trajectory of the fast-varying and predictable  
101 speech input (von Kriegstein et al., 2008; Díaz et al., 2012). If this is the case, then the task-  
102 dependent modulation of the vMGB should be especially strong when the fast dynamics of  
103 speech have to be recognised in conditions with high sensory uncertainty (Yu and Dayan,  
104 2005; Feldman and Friston, 2010; Díaz et al., 2012; Van de Cruys et al., 2014), for example  
105 when the incoming signal is disturbed (Yu and Dayan, 2005; Friston and Kiebel, 2009;

106 Feldman and Friston, 2010; Gordon et al., 2017). In the present study we tested this  
107 hypothesis.

## 108 **2. Materials and Methods**

### 109 **2.1 Study overview**

110 Presentation of speech in background noise is an ecologically valid way to increase  
111 uncertainty about the speech input (Chandrasekaran and Kraus, 2010a). We, therefore,  
112 tested, whether the task-dependent modulation of the left vMGB for speech is higher when  
113 the speech stimuli are embedded in a noisy as opposed to a clear background. We used ultra-  
114 high field functional magnetic resonance imaging (fMRI) at 7 T and a design that has been  
115 shown to elicit task-dependent modulation of the MGB in previous studies (von Kriegstein et  
116 al., 2008; Díaz et al., 2012). We complemented the design by a noise factor: the speech stimuli  
117 (i.e., vowel-consonant-vowel syllables) were presented with and without background noise  
118 (Figure 1). The experiment was a  $2 \times 2$  factorial design with the factors task (speech task,  
119 speaker task) and noise (noise, clear). To test our hypothesis, we performed a task  $\times$  noise  
120 interaction analysis with the prediction that the task-dependent modulation of the left vMGB  
121 increases with decreasing signal-to-noise ratios (i.e., increasing uncertainty about the speech  
122 sounds). We focused on the left vMGB for two reasons. First, its response showed behavioural  
123 relevance for speech recognition in previous studies (von Kriegstein et al., 2008; Mihai et al.,  
124 2019). Second, developmental dyslexia – a condition that is often associated with speech-in-  
125 noise recognition difficulties (Chandrasekaran et al., 2009; Ziegler et al., 2009) – has been  
126 associated with reduced task-dependent modulation of the left MGB in comparison to

127 controls (Díaz et al., 2012) as well as decreased connections between left MGB and left  
128 auditory association cortex (Tschentscher et al., 2019).

129 In addition to testing our main hypothesis, the design also allowed the exploration of the role  
130 of the inferior colliculus (IC) – the midbrain station of the auditory sensory pathway – in  
131 speech-in-noise recognition.

## 132 **2.2 Participants**

133 The Ethics committee of the Medical Faculty, University of Leipzig, Germany, approved the  
134 study. We recruited 17 participants (mean age 27.7, SD 2.5 years, 10 female; 15 of these  
135 participated in a previous study: Mihai et al., 2019) from the database of the Max Planck  
136 Institute for Human Cognitive and Brain Sciences (MPI-CBS), Leipzig, Germany. The sample  
137 size was based on the amount of data acquisition time allocated by the MPI-CBS directorial  
138 board to the study. The participants were right-handed (as assessed by the Edinburgh  
139 Handedness Inventory (Oldfield 1971)), and native German speakers. Participants provided  
140 written informed consent. None of the participants reported a history of psychiatric or  
141 neurological disorders, hearing difficulties, or current use of psychoactive medications.  
142 Normal hearing abilities were confirmed with pure tone audiometry (250 Hz to 8000 Hz;  
143 Madsen Micromate 304, GN Otometrics, Denmark) with a threshold equal to and below 25  
144 dB). To exclude possible undiagnosed developmental dyslexics, we tested the participant's  
145 reading speed and reading comprehension using the German LGVT: 6-12 test (Schneider et  
146 al., 2007). The cut-off for both reading scores was set to those levels mentioned in the test  
147 instructions as the “lower average and above” performance range (i.e., 26% - 100% of the  
148 calculated population distribution). None of the participants performed below the cut off

149 performance (mean 68.7%, SD 20.6%, lowest mean score: 36%). In addition, participants  
150 were tested on rapid automatized naming (RAN) of letters, numbers, and objects (Denckla  
151 and Rudel, 1976). The time required to name letters and numbers predicts reading ability  
152 and is longer in developmental dyslexics compared with typical readers, whereas the time to  
153 name objects is not a reliable predictor of reading ability in adults (Semrud-Clikeman et al.,  
154 2000). Participants scored well within the range of control participants for letters (mean  
155 17.25, SD 2.52 s), numbers (mean 16.79, SD 2.63 s), and objects (mean 29.65, SD 4.47 s),  
156 based on results from a previous study (Díaz et al., 2012, letters: 16.09, SD 2.60; numbers:  
157 16.49, SD 2.35; objects: 30.84, SD 5.85; age of participants was also comparable 23.5, SD 2.8  
158 years ). Furthermore, none of the participants exhibited a clinically relevant number of traits  
159 associated with autism spectrum disorder as assessed by the Autism Spectrum Quotient [AQ;  
160 mean: 15.9, SD 4.1; cut-off: 32-50; (Baron-Cohen et al., 2001)]. We tested AQ as autism can  
161 be associated with difficulties in speech-in-noise perception (Alcántara et al., 2004; Groen et  
162 al., 2009). Participants received monetary compensation for participating in the study.

## 163 **2.2 Stimuli**

164 We recorded 79 different vowel-consonant-vowel (VCV) syllables with an average duration  
165 of 784 ms, SD 67 ms. These recordings constitute a subsample from those used in (Mihai et  
166 al., 2019). These were spoken by one male voice (age 29 years), recorded with a video camera  
167 (Canon Legria HFS10, Canon, Japan) and a Røde NTG-1 microphone (Røde Microphones,  
168 Silverwater, NSW, Australia) connected to a pre-amplifier (TubeMP Project Series, Applied  
169 Research and Technology, Rochester, NY, USA) in a sound-attenuated room. The sampling  
170 rate was 48 kHz at 16 bit. Auditory stimuli were cut and flanked by Hamming windows of 15



171 ms at the beginning and end, converted to mono, and root-mean-square equalised using  
172 Python 3.6 (Python Software Foundation, [www.python.org](http://www.python.org)). The 79 auditory files were  
173 resynthesized with TANDEM-STRAIGHT (Banno et al., 2007) to create three different  
174 speakers: 79 auditory files with a vocal tract length (VTL) of 17 cm and glottal pulse rate  
175 (GPR) of 100 Hz, 79 with VTL of 16 cm and GPR of 150 Hz, and 79 with VTL of 14 cm and GPR  
176 of 300 Hz. This procedure resulted in 237 different auditory stimuli. The parameter choice  
177 (VTL and GPR) was motivated by the fact that a VTL difference of 25% and a GPR difference  
178 of 45% suffices for listeners to hear different speaker identities (Gaudrain et al., 2009a;  
179 Kreitewolf et al., 2014). Additionally, we conducted pilot experiments (12 pilot participants  
180 which did not participate in the main experiment) in order to fine-tune the combination of  
181 VTL and GPR that resulted in a balanced behavioural accuracy score between the speech and  
182 speaker tasks. The pilot experiments were conducted outside the MRI-machine, but included  
183 continuous recordings of MRI-gradient noise to simulate a real MRI-environment.

184 We embedded the 237 stimuli in background noise to create the stimuli for the condition  
185 with background noise. The background noise consisted of normally distributed random  
186 (white) noise filtered with a speech-shaped envelope. We calculated the envelope from the  
187 sum of all VCV stimuli presented in the experiment. We used speech-shaped noise as it has a  
188 stronger masking effect than stationary random non-speech noise (Carhart et al., 1975).  
189 Before each experimental run, the noise was computed and added to the stimuli included in  
190 the run with a signal-to-noise ratio (SNR) of 2 dB. The SNR choice was based on a pilot study  
191 that showed a performance decrease of at least 5% but no greater than 15% between the  
192 clear and noise condition. In the pilot study, we started at an SNR of -10 dB and increased this

193 value until we converged on an SNR of 2 dB. Calculations were performed in Matlab 8.6 (The  
194 Mathworks Inc., Natick, MA, USA) on Ubuntu Linux 16.04 (Canonical Ltd., London, UK).

## 195 **2.3 Procedure**

196 We conceived the experiment as a  $2 \times 2$  factorial design. The first factor was task (speech,  
197 speaker) similar to previous experiments that reported task-dependent modulation of the  
198 MGB (von Kriegstein et al., 2008; Díaz et al., 2012; Mihai et al., 2019). The second factor was  
199 background noise (clear, noise, Figure 1). Participants listened to blocks of auditory VCV  
200 syllables and were asked to perform the two types of tasks: the speech task and the speaker  
201 task. In the speech task, participants reported via button press whether the current syllable  
202 was different from the previous one (1-back task). In the speaker task, participants reported  
203 via button press whether the current speaker was different from the previous one. The blocks  
204 had either syllables with background noise (noise condition) or without background noise  
205 (clear condition).

## Noise

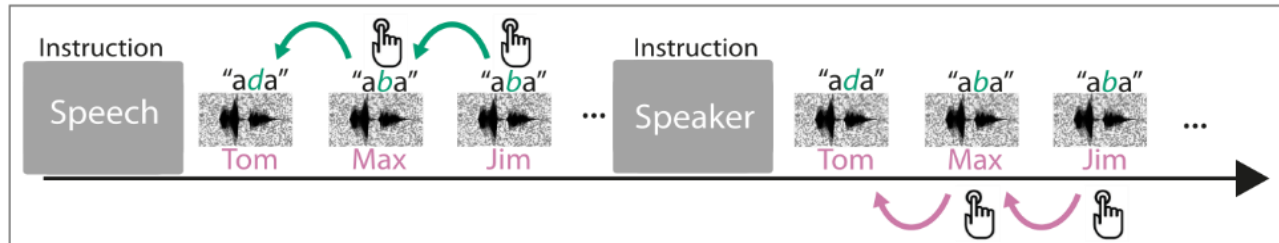

## Clear

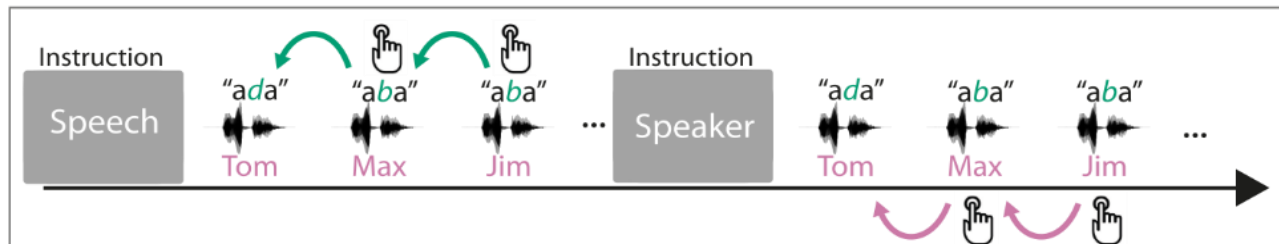

- 206
- 207 One-back speech task: same/different syllable?
  - 208 One-back speaker task: same/different speaker?

207 *Figure 1. Design and trial structure of the experiment. In the speech task, listeners performed a*  
208 *one-back syllable task. They pressed a button whenever there was a change in syllable in*  
209 *contrast to the immediately preceding one, independent of speaker change. The speaker task*  
210 *used precisely the same stimulus material and trial structure. The task was to press a button*  
211 *when there was a change in speaker identity in contrast to the immediately preceding one,*  
212 *independent of syllable change. The speakers' voices were resynthesized from the recordings of*  
213 *one speaker's voice to only differ in constant speaker individuating features (i.e., the vocal tract*  
214 *length and the fundamental frequency of the voice). This ensured that the speaker task could*  
215 *not be done on dynamic speaker individuating features (e.g., idiosyncrasies in pronunciations of*  
216 *phonemes). An initial task instruction screen informed participants about which task to*  
217 *perform. Participants heard stimuli either with concomitant speech-shaped noise (noise*  
218 *condition) or without background noise (clear condition). Thus the experiment had four*  
219 *conditions: speech task/noise, speaker task/noise, speech task/clear, speaker task/clear.*  
220 *Stimuli in the speech and speaker tasks were precisely identical.*

221

222 Task instructions were presented for two seconds before each block and consisted of white

223 written words on a black background (German words "Silbe" for syllable indicating the

224 speech task, and "Person" for person indicating the speaker task). After the instruction, the

225 block of syllables started (Figure 1). Each block contained twelve stimuli. Each stimulus had

226 a duration of approximately 784 ms, and the stimulus presentation was followed by 400 ms

227 of silence. Within one block both syllables and speakers changed at least twice, with a  
228 theoretical maximum of nine changes. The theoretical maximum was derived from random  
229 sampling of seven instances from three possible change types: no change, speech change,  
230 speaker change, and change of speech and speaker. The average length of a block was 15.80  
231 seconds, SD 0.52 seconds. The presentation of the stimuli was randomized and balanced with  
232 regard to the amount of speaker identity and syllable changes within a block. The same block  
233 containing speaker identity changes also contained syllable changes. These blocks were  
234 repeated, once with the instruction to perform the speaker identity task and the other time  
235 to perform the speech task. This procedure ensured that subjects heard exactly the same  
236 stimuli while performing the two different tasks.

237 The experiment was divided into four runs. The first three runs had a duration of 12:56 min  
238 and included 40 blocks: 10 for each of the four conditions (speech task/noise, speaker  
239 task/noise, speech task/clear, speaker task/clear). A fourth run had a duration of 6:32 min  
240 and included 20 blocks (5 for each of the four conditions). For two participants, only the first  
241 three runs were recorded due to time constraints. Participants could rest for one minute  
242 between runs.

243

244 Participants were familiarised with the three speakers' voices to ensure that they could  
245 perform the speaker-identity task of the main experiment. The speaker familiarisation took  
246 place 30 minutes before the fMRI experiment. It consisted of a presentation of the speakers  
247 and a test phase. In the presentation phase, the speakers were presented in six blocks, each  
248 containing nine pseudo-randomly chosen VCV stimuli from the 237 total. Each block

249 contained one speaker-identity only. Participants were alerted to the onset of a new speaker  
250 identity block by the presentation of white words on a black screen indicating speaker 1,  
251 speaker 2, or speaker 3. Participants listened to the voices with the instruction to memorise  
252 the speaker's voice. In the following test phase participants were presented with four blocks  
253 of nine trials that each contained randomly chosen syllable pairs spoken by the three  
254 speakers. The syllable pairs could be from the same or a different speaker. We asked  
255 participants to indicate whether the speakers of the two syllables were the same by pressing  
256 keypad buttons "1" for yes and "2" for no. Participants received visual feedback for correct  
257 (the green flashing German word for correct: "Richtig") and incorrect (the red flashing  
258 German word for incorrect: "Falsch") answers. The speaker familiarisation consisted of three  
259 2:50 min runs (each run contained one presentation and one test phase). If participants  
260 scored below 80% on the last run, they performed an additional run until they scored above  
261 80%. All participants exceeded the 80% cut-off value.

262 The experiments were programmed in the Matlab Psychophysics Toolbox [Psychtoolbox-  
263 3, [www.psychtoolbox.com](http://www.psychtoolbox.com) (Brainard, 1997)] running on Matlab 8.6 (The Mathworks Inc.,  
264 Natick, MA, USA) on Ubuntu Linux 16.04 (Canonical Ltd., London, UK). The sound was  
265 delivered through a MrConfon amplifier and headphones (manufactured 2008; MrConfon  
266 GmbH, Magdeburg, Germany).

## 267 **2.4 Data Acquisition and Processing**

268 MRI data were acquired using a Siemens Magnetom 7 T scanner (Siemens AG, Erlangen,  
269 Germany) with an 8-channel head coil. We convened on the 8-channel coil, due to its  
270 spaciousness which allowed the use of higher quality headphones (manufactured 2008;

271 MrConfon GmbH, Magdeburg, Germany). Functional MRI data were acquired using echo-  
272 planar imaging (EPI) sequences. We used partial brain coverage with 30 slices. The volume  
273 was oriented in parallel to the superior temporal gyrus such that the slices encompassed the  
274 MGB, the inferior colliculi (IC), and the Heschl's gyrus.

275 The EPI sequences had the following acquisition parameters: TR = 1600 ms, TE = 19 ms, flip  
276 angle 65°, GRAPPA (Griswold et al., 2002) with acceleration factor 2, 33% phase  
277 oversampling, matrix size 88, field of view (FoV) of 132 mm x 132 mm, phase partial Fourier  
278 6/8, voxel size 1.5 mm isotropic resolution, interleaved acquisition, anterior to posterior  
279 phase-encode direction. The first three runs consisted of 485 volumes (12:56 min), and the  
280 fourth run consisted of 245 volumes (6:32 min). During functional MRI data acquisition, we  
281 also acquired physiological values (heart rate, and respiration rate) using a BIOPAC MP150  
282 system (BIOPAC Systems Inc., Goleta, CA, USA).

283 To address geometric distortions in EPI images we recorded gradient echo based field maps  
284 which had the following acquisition parameters: TR = 1500 ms, TE1 = 6.00 ms, TE2 = 7.02  
285 ms, flip angle 60°, 0% phase oversampling, matrix size 100, FoV 220 mm x 220 mm, phase  
286 partial Fourier off, voxel size 2.2 mm isotropic resolution, interleaved acquisition, anterior to  
287 posterior phase-encode direction. Resulting images from field map recordings were two  
288 magnitude images and one phase difference image.

289 Structural images were recorded using an MP2RAGE (Marques et al., 2010) T1 protocol: 700  
290  $\mu\text{m}$  isotropic resolution, TE = 2.45ms, TR = 5000 ms, TI1 = 900 ms, TI2 = 2750 ms, flip angle  
291 1 = 5°, flip angle 2 = 3°, FoV 224 mm x 224 mm, GRAPPA acceleration factor 2, duration 10:57  
292 min.

## 293 2.5 Behavioural Data Analysis

294 Button presses (hits, misses) were binomially distributed, and were thus modeled using a  
295 binomial logistic regression which predicts the probability of correct button presses based  
296 on four independent variables (speech task/noise, speaker task/noise, speech task/clear,  
297 speaker task/clear) in a Bayesian framework (McElreath, 2018).

298 To pool over participants and runs we modelled the correlation between intercepts and  
299 slopes. For the model implementation and data analysis, we used PyMC3 3.5 (Salvatier et al.,  
300 2016), a probabilistic programming package for Python 3.6. We sampled with a No-U-Turn  
301 Sampler (Hoffman and Gelman, 2014) with four parallel chains. Per chain, we had 5,000  
302 samples with 5,000 as warm-up. The data entering the model was mean centered by  
303 subtracting the mean and dividing by two standard deviations (Gelman and Hill, 2006). This  
304 transformation does not change the fit of the linear model and the coefficients are  
305 interpretable in comparison to the mean of the data. The reason behind this transformation  
306 is the faster and more accurate convergence of the Markov Chain sampling (McElreath,  
307 2018).

308 There were the following effects of interest: main effects (clear - noise, speech task - speaker  
309 task), the interaction (speech task/ noise - speaker task/ noise) - (speech task/ clear -  
310 speaker task/ clear), simple main effects (speech task/ noise - speaker task/ noise, speech  
311 task/ clear - speaker task/ clear). For the effects of interest, we calculated means from the  
312 posterior distributions and 95% highest posterior density intervals (HPD). The HPD is the  
313 probability that the mean lies within the interval (Gelman et al., 2013; McElreath, 2018), this  
314 means that we are 95% sure the mean lies within the specified interval bounds. If the

315 posterior probability distribution of odds ratios does not strongly overlap one (i.e., the HPD  
316 excludes one), then it is assumed that there is a detectable difference between  
317 conditions (Bunce and McElreath, 2017; McElreath, 2018).

318  
319 The predictors included in the behavioural data model were: task ( $x_S$ : 1 = speech task, 0 =  
320 speaker task), and background noise ( $x_N$ : 1 = noise, 0 = clear). We also included the two-way  
321 interaction of task and noise condition. Because data were collected across participants and  
322 runs, we included random effects for both of these in the logistic model. Furthermore, since  
323 ~11% of the data exhibited ceiling effects (i.e., some participants scored at the highest  
324 possible level) which would result in underestimated means and standard deviations (Uttl,  
325 2005), we treated these data as right-censored and modeled them using a Potential  
326 class (Lauritzen et al., 1990; Jordan, 1998) as implemented in PyMC3. This method integrates  
327 the censored values using the log of the complementary normal cumulative distribution  
328 function (Gelman et al., 2013; McElreath, 2018). In essence, we sampled twice, once for the  
329 observed values without the censored data points, and once for the censored values only. The  
330 model is described below.

331

332

333 
$$L_{i,j} \sim \text{Binomial}(1, p_{i,j})$$

334 
$$p_{i,j} = \begin{cases} p_{i,j}^* & \text{for } p_{i,j}^* < c \\ c & \text{for } p_{i,j}^* \geq c \end{cases}$$

335 
$$\text{logit}(p_{i,j}^*) = A_{i,j} + B_{S,i,j}x_S + B_{N,i,j}x_N + B_{SN,i,j}x_Sx_N, \text{ for } i = 1, \dots, I; j = 1, \dots, J$$



$$336 \quad A_{i,j} = \alpha + \alpha_{\text{participant}[i]} + \alpha_{\text{run}[j]}$$

$$337 \quad B_{S,i,j} = \beta_S + \beta_{S,\text{participant}[i]} + \beta_{S,\text{run}[j]}$$

$$338 \quad B_{N,i,j} = \beta_N + \beta_{N,\text{participant}[i]} + \beta_{N,\text{run}[j]}$$

$$339 \quad B_{SN,i,j} = \beta_{SN} + \beta_{SN,\text{participant}[i]} + \beta_{SN,\text{run}[j]}$$

$$340 \quad \begin{bmatrix} \alpha_{\text{participant}} \\ \beta_{S,\text{participant}} \\ \beta_{N,\text{participant}} \\ \beta_{SN,\text{participant}} \end{bmatrix} \sim \text{MVNormal} \left( \begin{bmatrix} \alpha \\ \beta_S \\ \beta_N \\ \beta_{SN} \end{bmatrix}, S_{\text{participant}} \right)$$

$$341 \quad \begin{bmatrix} \alpha_{\text{run}} \\ \beta_{S,\text{run}} \\ \beta_{N,\text{run}} \\ \beta_{SN,\text{run}} \end{bmatrix} \sim \text{MVNormal} \left( \begin{bmatrix} \alpha \\ \beta_S \\ \beta_N \\ \beta_{SN} \end{bmatrix}, S_{\text{run}} \right)$$

$$342 \quad S_{\text{subject}} = \begin{bmatrix} \sigma_\alpha & 0 & 0 & 0 \\ 0 & \sigma_{\beta_S} & 0 & 0 \\ 0 & 0 & \sigma_{\beta_N} & 0 \\ 0 & 0 & 0 & \sigma_{\beta_{SN}} \end{bmatrix} R_{\text{subject}} \begin{bmatrix} \sigma_\alpha & 0 & 0 & 0 \\ 0 & \sigma_{\beta_S} & 0 & 0 \\ 0 & 0 & \sigma_{\beta_N} & 0 \\ 0 & 0 & 0 & \sigma_{\beta_{SN}} \end{bmatrix}$$

$$343 \quad S_{\text{run}} = \begin{bmatrix} \sigma_\alpha & 0 & 0 & 0 \\ 0 & \sigma_{\beta_S} & 0 & 0 \\ 0 & 0 & \sigma_{\beta_N} & 0 \\ 0 & 0 & 0 & \sigma_{\beta_{SN}} \end{bmatrix} R_{\text{run}} \begin{bmatrix} \sigma_\alpha & 0 & 0 & 0 \\ 0 & \sigma_{\beta_S} & 0 & 0 \\ 0 & 0 & \sigma_{\beta_N} & 0 \\ 0 & 0 & 0 & \sigma_{\beta_{SN}} \end{bmatrix}$$

$$344 \quad \alpha \sim \text{Normal}(0,5)$$

$$345 \quad \beta_S \sim \text{Normal}(0,5)$$

$$346 \quad \beta_N \sim \text{Normal}(0,5)$$

$$347 \quad \beta_{SN} \sim \text{Normal}(0,5)$$

$$348 \quad (\sigma_{\text{participant}}, \sigma_{\text{run}}) \sim \text{HalfCauchy}(1)$$

349 
$$\sigma_{corr,participant} \sim HalfCauchy(1)$$

350 
$$\sigma_{corr,run} \sim HalfCauchy(1)$$

351 
$$R_{participant} \sim LKJcorr(4, \sigma_{corr,participant})$$

352 
$$R_{run} \sim LKJcorr(4, \sigma_{corr,run})$$

353  $I$  represents the participants and  $J$  the runs. The model is compartmentalized into sub-models  
354 for the intercepts and slopes.  $A_{i,j}$  is the sub-model for the intercept for observations  $i, j$ .  
355 Similarly,  $B_{S,i,j}$ ,  $B_{N,i,j}$ , and  $B_{SN,i,j}$  are the sub-models for the speech task – speaker task slope,  
356 clear-noise slope and the interaction slope, respectively;  $S_{subject}/S_{run}$  are the covariance  
357 matrices for participant/run.  $R_{subject}/R_{run}$  are the priors for the correlation matrices  
358 modelled as LKJ probability densities (Lewandowski et al., 2009). Weakly informative priors  
359 for the intercept ( $\alpha$ ) and additional coefficients (e.g.,  $\beta_S$ ), random effects for participant and  
360 run ( $\beta_{S,subject}$ ,  $\beta_{S,run}$ ), and multivariate priors for participants and runs identify the model  
361 by constraining the position of  $p_{i,j}$  to reasonable values. Here we used normal distributions  
362 as priors. Furthermore,  $p_{i,j}$  is defined as the ramp function equal to the proportion of hits  
363 when these are known and below the ceiling ( $c$ ), and set to the ceiling if they are equal to or  
364 greater than the ceiling  $c$ .

365 We additionally analyzed the reaction times, similarly to the model described above but  
366 without consideration of ceiling effects as they are non-existent. Posterior distributions were  
367 computed for each condition, and we computed main effects and the interaction between  
368 task and noise. If the posterior probability distribution of the difference scores and the

369 interaction does not strongly overlap zero (i.e., the HPD excludes zero), then it is assumed  
370 that there is a detectable difference (Bunce and McElreath, 2017; McElreath, 2018).

371

## 372 **2.6 Functional MRI Data Analysis**

### 373 **2.6.1 Preprocessing of fMRI data**

374 The MP2RAGE images were first segmented using SPM's segment function (SPM 12, version  
375 12.6906, Wellcome Trust Centre for Human Neuroimaging, UCL, UK,  
376 <http://www.fil.ion.ucl.ac.uk/spm>) running on Matlab 8.6 (The Mathworks Inc., Natick, MA,  
377 USA) in Ubuntu Linux 16.04 (Canonical Ltd., London, UK). The resulting grey and white  
378 matter segmentations were summed and binarised to remove voxels that contain air, scalp,  
379 skull and cerebrospinal fluid from structural images using the ImCalc function of SPM.

380 We used the template image created for a previous study (Mihai et al., 2019) using structural  
381 MP2RAGE images from the 28 participants of that study. We chose this template since 15  
382 participants in the current study are included in this image, and the vMGB mask (described  
383 below) is in the same space as the template image. The choice of this common template  
384 reduces warping artefacts, which would be introduced with a different template, as both the  
385 vMGB mask and the functional data of the present study would need to be warped to a  
386 common space. The template was created and registered to MNI space with ANTs (Avants et  
387 al., 2008) and the MNI152 template provided by FSL 5.0.8 (Smith et al., 2004). All MP2RAGE  
388 images were preprocessed with Freesurfer (Fischl et al., 2004; Han and Fischl, 2007) using

389 the recon-all command to obtain boundaries between grey and white matter, which were  
390 later used in the functional to structural registration step.

391 Preprocessing and statistical analyses pipelines were coded in nipype 1.1.2 (Gorgolewski et  
392 al., 2011). Head motion and susceptibility distortion by movement interaction of functional  
393 runs were corrected using the Realign and Unwarp method (Andersson et al., 2001) in SPM  
394 12. This step also makes use of a voxel displacement map (VDM), which addresses the  
395 problem of geometric distortions in EPI caused by magnetic field inhomogeneity. The VDM  
396 was calculated using field map recordings, which provided the absolute value and the phase  
397 difference image files, using the FieldMap Toolbox (Jezzard and Balaban, 1995) of SPM 12.  
398 Outlier runs were detected using ArtifactDetect (composite threshold of translation and  
399 rotation: 1; intensity Z-threshold: 3; global threshold: 8;  
400 [https://www.nitrc.org/projects/artifact\\_detect/](https://www.nitrc.org/projects/artifact_detect/)). Coregistration matrices for realigned  
401 functional runs per participant were computed based on each participant's structural image  
402 using Freesurfer's BBregister function (register mean EPI image to T1). We used a whole-  
403 brain EPI volume as an intermediate file in the coregistration step to avoid registration  
404 problems due to the limited FoV of the functional runs. Warping using coregistration  
405 matrices (after conversion to the ITK coordinate system) and resampling to 1 mm isovoxel  
406 was performed using ANTs. Before model creation, we smoothed the data in SPM12 using a  
407 1 mm kernel at full-width half-maximum.

## 408 **2.6.2 Physiological data**

409 Physiological data (heart rate and respiration rate) were processed by the PhysIO Toolbox  
410 (Kasper et al., 2017) to obtain Fourier expansions of each, in order to enter these into the

411 design matrix (see section 2.6.3 Testing our hypothesis in the left vMGB). Since heartbeats  
412 and respiration result in undesired cortical and subcortical artefacts, regressing these out  
413 increases the specificity of fMRI responses to the task of interest (Kasper et al., 2017). These  
414 artefacts occur in abundance around the thalamus (Kasper et al., 2017).

### 415 **2.6.3 Testing our hypothesis in the left vMGB**

416 Models were set up in SPM 12 using the native space data for each participant. We modelled  
417 five conditions of interest: speech task/noise, speaker task/noise, speech task/clear, speaker  
418 task/clear, and task instruction. Onset times and durations were used to create boxcar  
419 functions, which were convolved with the hemodynamic response function (HRF) provided  
420 by SPM 12. The design matrix also included the following nuisance regressors: three cardiac,  
421 four respiratory, and a cardiac  $\times$  respiratory interaction regressor. We additionally entered  
422 the outlier regressors from the ArtifactDetect step.

423 Parameter estimates were computed for each condition at the first level using restricted  
424 maximum likelihood (REML) as implemented in SPM 12. Parameter estimates for each of the  
425 four conditions of interest (speech task/noise, speaker task/noise, speech task/clear,  
426 speaker task/clear) were registered to the MNI structural template using a two-step  
427 registration in ANTs. First, a quick registration was performed on the whole head using rigid,  
428 affine and diffeomorphic transformations (using Symmetric Normalization, SyN), and the  
429 mutual information similarity metric. Second, the high-quality registration was confined to

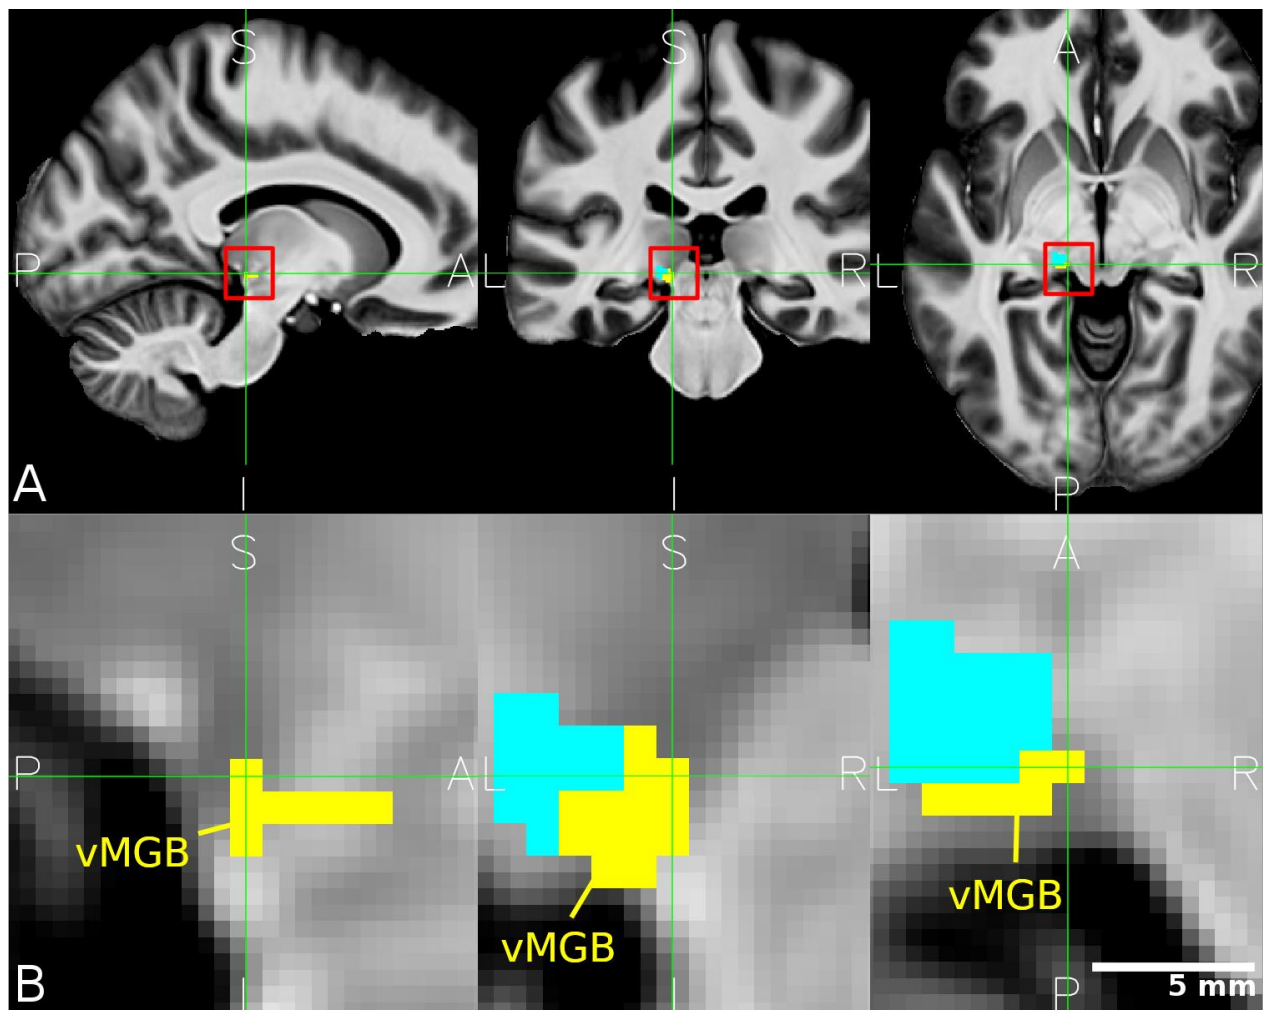

430

431 *Figure 2. Location of the left MGB masks. (A) The mean structural image across participants (n*  
432 *= 33) in MNI space. The red squares denote the approximate location of the left MGB and*  
433 *encompass the zoomed in view in B. (B) Closeup of the left vMGB (yellow). The tonotopic*  
434 *gradient two is shown in cyan. Panels correspond to sagittal, coronal, and axial slices (P:*  
435 *posterior, A: anterior, S: superior, I: inferior, L: left, R: right).*

436 the volume that was covered by the 30 slices of the EPI images. These volumes include the  
437 IC, MGB, and primary and secondary auditory cortices. This step used affine and SyN  
438 transformations and mean squares and neighbourhood cross-correlation similarity

439 measures. We performed the registration to MNI space by linearly interpolating the contrast  
440 images using the composite transforms from the high-quality registration.

441 We extracted parameter estimates for each of the four conditions of interest per participant,  
442 averaged over all voxels from the region of interest, i.e., the left vMGB. To locate the left vMGB,  
443 we used the mask from (Mihai et al., 2019), which included 15 of the 17 participants of the  
444 present study (Figure 2).

445 We analysed the extracted parameter estimates in a Bayesian framework (McElreath, 2018).  
446 The data entering the model was mean centered by subtracting the mean and dividing by two  
447 standard deviations (Gelman and Hill, 2006). This transformation does not change the fit of  
448 the linear model and the coefficients are interpretable in comparison to the mean of the data.  
449 The reason behind this transformation is the faster and more accurate convergence of the  
450 Markov Chain sampling (McElreath, 2018). The model was implemented in PyMC3 with a No-  
451 U-Turn Sampler with four parallel chains. Per chain, we sampled posterior distributions  
452 which had 5000 samples with 5000 as warm-up. The predictors included in the model were:  
453 task ( $x_S$ : 1 = speech task, 0 = speaker task), and background noise ( $x_N$ : 1 = noise, 0 = clear).  
454 We also included the two-way interaction of task and noise condition. Because data were  
455 collected across participants, it was reasonable to include random effects. To pool over  
456 participants, we modelled the correlation between intercepts and slopes over participants.  
457 The interaction model is described below.

458

459

460

$$L_i \sim T(\mu_i, \nu, \lambda)$$

461 
$$\mu_i = A_i + B_{S,i}x_S + B_{N,i}x_N + B_{SN,i}x_Sx_N, \text{ for } i = 1, \dots, I$$

462 
$$A_i = \alpha + \alpha_{\text{participant}[i]}$$

463 
$$B_{S,i} = \beta_S + \beta_{S,\text{participant}[i]}$$

464 
$$B_{N,i} = \beta_N + \beta_{N,\text{participant}[i]}$$

465 
$$B_{SN,i} = \beta_{SN} + \beta_{SN,\text{participant}[i]}$$

466 
$$\begin{bmatrix} \alpha_{\text{participant}} \\ \beta_{S,\text{participant}} \\ \beta_{N,\text{participant}} \\ \beta_{SN,\text{participant}} \end{bmatrix} \sim \text{MVNormal} \left( \begin{bmatrix} \alpha \\ \beta_S \\ \beta_N \\ \beta_{SN} \end{bmatrix}, S \right)$$

467 
$$S = \begin{bmatrix} \sigma_\alpha & 0 & 0 & 0 \\ 0 & \sigma_{\beta_S} & 0 & 0 \\ 0 & 0 & \sigma_{\beta_N} & 0 \\ 0 & 0 & 0 & \sigma_{\beta_{SN}} \end{bmatrix} R \begin{bmatrix} \sigma_\alpha & 0 & 0 & 0 \\ 0 & \sigma_{\beta_S} & 0 & 0 \\ 0 & 0 & \sigma_{\beta_N} & 0 \\ 0 & 0 & 0 & \sigma_{\beta_{SN}} \end{bmatrix}$$

468 
$$\alpha \sim T(0,1,3)$$

469 
$$\beta_S \sim T(0,1,3)$$

470 
$$\beta_N \sim T(0,1,3)$$

471 
$$\beta_{SN} \sim T(0,1,3)$$

472 
$$(\sigma_{\text{participant}}) \sim \text{HalfCauchy}(1)$$

473 
$$\sigma_{\text{corr}} \sim \text{HalfCauchy}(1)$$

474 
$$R \sim \text{LKJcorr}(4, \sigma_{\text{corr}})$$

475 
$$v \sim \text{Exponential}(1/29) + 1$$



476 
$$\sigma \sim \text{HalfCauchy}(2)$$

477 
$$\lambda = \sigma^{-2}$$

478  $I$  represents the participants. The model is compartmentalized into sub-models for the  
479 intercepts and slopes.  $A_i$  is the sub-model for the intercept for observations  $i$ .  
480 Similarly,  $B_{S,i}$ ,  $B_{N,i}$ , and  $B_{SN,i}$  are the sub-models for the speech task -speaker task slope,  
481 clear-noise slope and the interaction slope, respectively;  $S$  is the covariance matrix and  $R$  is  
482 the prior for the correlation matrix modelled as an LKJ probability density (Lewandowski et  
483 al., 2009). Weakly informative priors for the intercept ( $\alpha$ ) and additional coefficients  
484 (e.g.,  $\beta_S$ ), random effects for participant ( $\beta_{S,subject}$ ), and multivariate priors for participants  
485 identify the model by constraining the position of  $\mu_i$  to reasonable values. Here we used  
486 Student's- $T$  distributions as priors.

487 From the model output, we calculated posterior distributions for each condition of interest  
488 (speech task/noise, speaker task/ noise, speech task/clear, speaker task/clear). Posterior  
489 distributions, in comparison to point estimates, have the advantage of quantifying  
490 uncertainty about each parameter. We summarised each posterior distribution using the  
491 mean as a point estimate (posterior mean) together with a 95% highest posterior density  
492 interval (HPD). The HPD is the probability that the mean lies within the interval (Gelman et  
493 al., 2013; McElreath, 2018), e.g., we are 95% sure the mean lies within the specified interval  
494 bounds. We computed the following contrasts of interest: interaction (speech task/noise –  
495 speaker task/noise) – (speech task/clear – speaker task/clear); simple main effects (speech  
496 task/noise – speaker task/noise), (speech task/clear – speaker task/clear); main effect of  
497 task (speech task – speaker task). Differences between conditions were converted to effect

498 sizes [Hedges  $g^*$  (Hedges and Olkin, 1985)]. Hedges  $g^*$ , like Cohen's  $d$  (Cohen, 1988), is a  
499 population parameter that computes the difference in means between two variables  
500 normalised by the pooled standard deviation with the benefit of correcting for small sample  
501 sizes. Based on Cohen (1988), we interpreted effect sizes on a spectrum ranging from small  
502 ( $g^* \approx 0.2$ ), to medium ( $g^* \approx 0.5$ ), to large ( $g^* \approx 0.8$ ), and beyond. If the HPD did not overlap  
503 zero, we considered this to be a robust effect (Bunce and McElreath, 2017; McElreath, 2018).  
504 However, we caution readers that if the HPD includes zero, it does not mean that the effect is  
505 missing (Amrhein et al., 2019). Instead, we quantify and interpret the magnitude (by the  
506 point estimate) and its uncertainty (by the HPD) provided by the data and our assumptions  
507 (Anderson, 2019).

#### 508 **2.6.4 Analyses of the left inferior colliculus**

509 The study design and acquisition parameters also allowed us to explore the involvement of  
510 the IC in speech-in-noise recognition (for a rationale of these exploratory analyses see  
511 results, section 3.2.2). To analyse the task  $\times$  noise interaction and the main effect of task in  
512 the bilateral IC we used the same analysis procedures as described for the left vMGB (see  
513 section 2.6.3 Testing our hypothesis in the left vMGB). As region of interest, we used the IC  
514 masks described in (Mihai et al., 2019) and limited them to the tonotopic parts of the IC, i.e.,  
515 the central nucleus (Figure 3), which corresponds to the primary auditory pathway (Davis,  
516 2005). We will call it

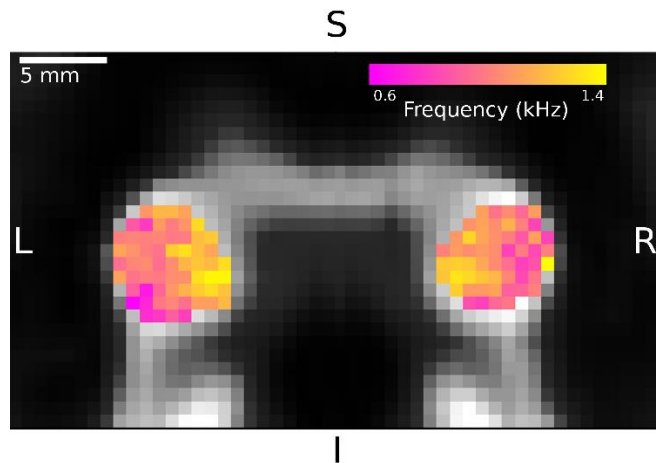

517  
518 *Figure 3. Tonotopy gradients in the inferior colliculi. The colored parts show one slice of the*  
519 *mean tonotopic map across participants in the left and right IC in coronal view (S: superior, I:*  
520 *inferior, L: left, R: right). Individual tonotopies showed high variability (results not shown). The*  
521 *mean tonotopy revealed a gradient from low frequencies in lateral locations to high frequencies*  
522 *in medial locations (Mihai et al., 2019). The maps were used to construct a region of interest for*  
523 *the central nucleus of the IC (cIC).*

524  
525 cIC in the following. Furthermore, we performed a Pearson's correlation calculation to  
526 analyse the correlation (speech - speaker task correlated with speech accuracy score) in the  
527 left cIC. The motivation for this test was based on similar correlations (i.e., speech - control  
528 task correlated with speech accuracy score) found in two previous experiments in the left  
529 cIC (von Kriegstein et al., 2008 experiment 1 and 2) (for further details see results, section  
530 3.2.2).

## 531 3. Results

### 532 3.1 Behavioural results

#### 533 3.1.1 Accuracy

534 Participants performed well above chance level in all four conditions (> 82% correct; Table  
535 1; Figure 4A).

536 *Table 1. The proportion of hits for each of the four conditions in the experiment. HDP: highest*  
537 *posterior density interval.*

|                       | <b>Speech task/<br/>Noise</b> | <b>Speaker task/<br/>Noise</b> | <b>Speech task/<br/>Clear</b> | <b>Speaker task/<br/>Clear</b> |
|-----------------------|-------------------------------|--------------------------------|-------------------------------|--------------------------------|
| Hit rate<br>[95% HPD] | 0.82 [0.62, 0.95]             | 0.87 [0.74, 0.96]              | 0.92 [0.83, 0.98]             | 0.90 [0.81, 0.97]              |

538

539 Performing the tasks with background noise was more difficult than the conditions without  
540 background noise for both the speech and the speaker task (Figure 4B, for details on  
541 statistics, see figure and legend). The rate of hits in the speech task was the same as in the  
542 speaker task (Figure 4C). There was a detectable interaction between task and noise (Figure  
543 4D/E), but simple main effects (i.e., speech task/noise - speaker task/noise (Figure 4F) and  
544 speech task/clear - speaker task/clear (Figure 4G)) were not present. We also observed  
545 ceiling effects in 11% of the cases, which were modeled accordingly (Materials and Methods,  
546 section 2.5).

547

548

549

550

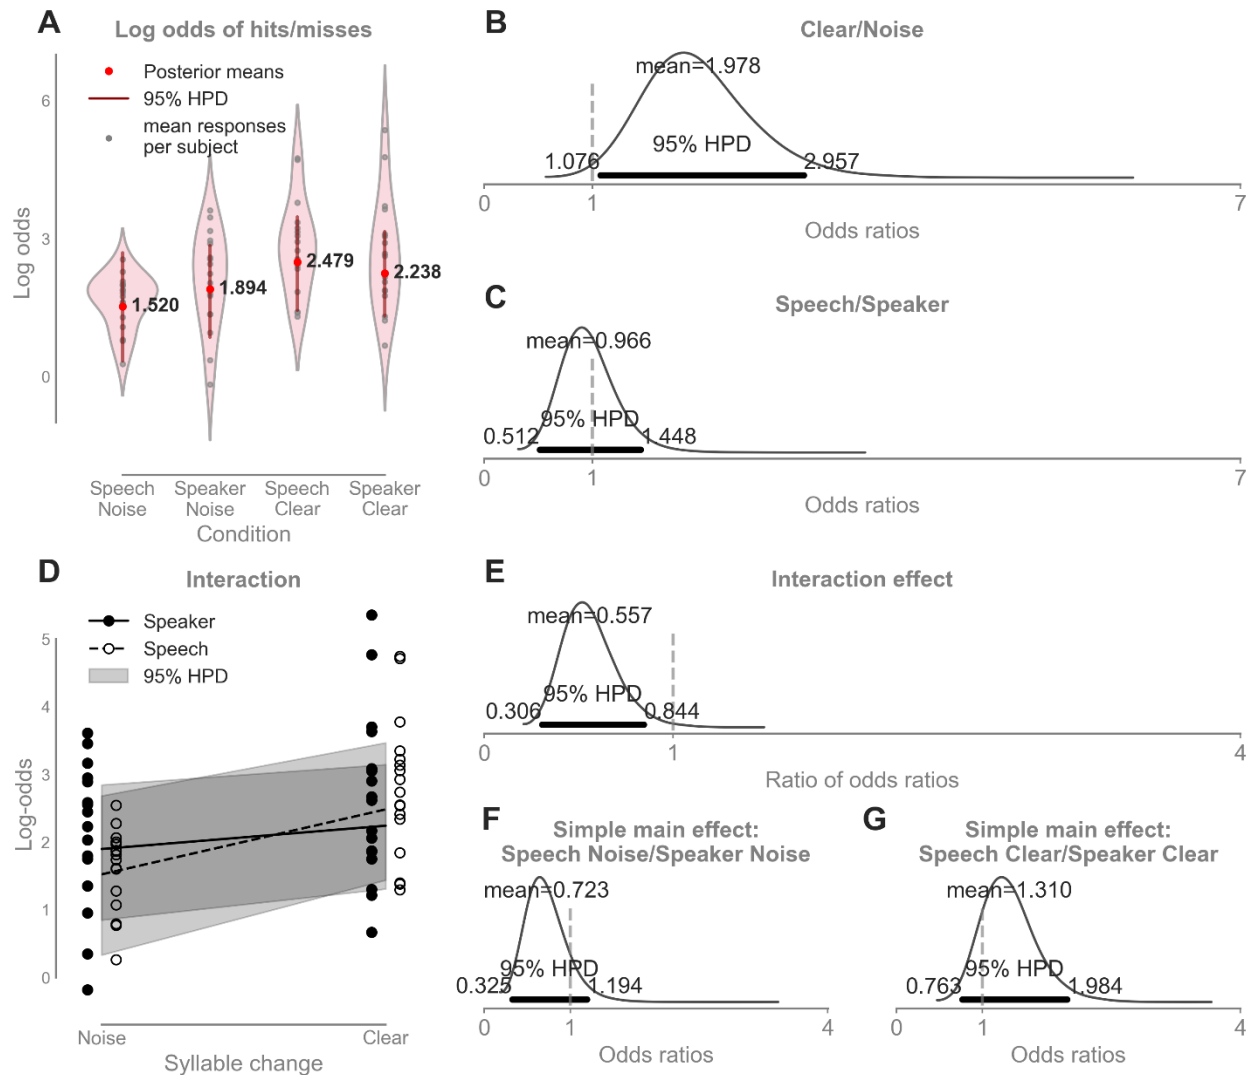

551

552 *Figure 4. Behavioural results. We performed a binomial logistic regression to compute the rate*  
 553 *of hits and misses in each condition because behavioural data were binomially distributed. For*  
 554 *this reason, results are reported in log odds and odds ratios. The results showed a detectable*  
 555 *main effect of noise and interaction between noise and task. There was no main effect of task,*

556 *and no detectable simple main effects (speech task/noise - speaker task/noise; speech*  
557 *task/clear - speaker task/clear). **A.** Log odds of hits and misses for each condition. The grey dots*  
558 *indicate mean responses for individual participants, the red dots and accompanying numbers*  
559 *denote the posterior mean per condition, and the dark red lines demarcate the 95% highest*  
560 *posterior density interval (HPD). The rate of hits compared to misses is plotted on a log scale to*  
561 *allow for a linear representation. **B.** Mean odds ratio for the clear and noise conditions. The odds*  
562 *of hits in the clear condition were on average twice as high as in the noise condition (the mean*  
563 *odds ratio was 1.978 [1.076, 2.957]). The HPD excluded 1 and indicated a detectable difference*  
564 *between conditions: No difference would be assumed if the odds ratio was 1 (50/50 chance or*  
565 *1:1 ratio; Chen, 2003). **C.** Mean odds ratio for the speech task - speaker task conditions. The*  
566 *mean odds ratio was ~1 indicating no difference between the speech and speaker task*  
567 *conditions. **D.** Visualization of the interaction (task × noise) as a comparison of slopes with 95%*  
568 *HPD. **E.** The ratio of odds ratios of the simple main effects speech task/noise - speaker task/noise*  
569 *and speech task/clear - speaker task/clear. The mean and 95% HPD was 0.557 [0.306, 0.844].*  
570 *The HPD excluded 1 indicating an interaction effect. **F.** Mean odds ratio for the simple main*  
571 *effect speech task/noise - speaker task/noise. The rate of hits in the speech task/noise condition*  
572 *was on average ~1/3 lower than the rate of hits in the speaker task/noise condition; however,*  
573 *the HPD strongly overlapped 1 indicating that there was no difference between conditions. **G.***  
574 *Mean odds ratio for the simple main effect speech task/clear - speaker task/clear. The rate of*  
575 *hits in the speech task/clear condition was on average ~1/3 higher than the rate of hits in the*  
576 *speaker task/clear condition; however, the HPD strongly overlapped 1 indicating that there was*  
577 *no detectable difference between conditions.*

578

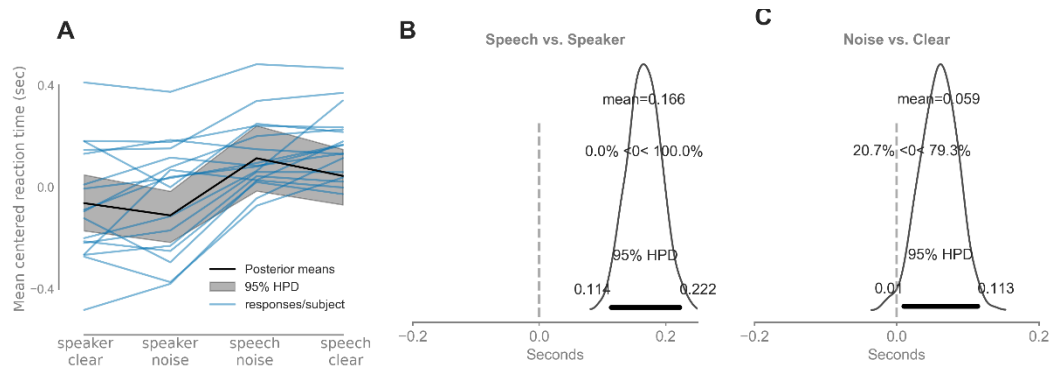

579  
580 **Figure 5.** Reaction times results. **A.** Mean centered reaction times for each condition. The blue  
581 lines indicate individual average reaction times, the black line denotes the estimated reaction  
582 time per condition averaged over participants and runs, the grey shaded area denotes the  
583 95% highest posterior density interval (HPD). **B.** Mean reaction time difference between the  
584 Speech and Speaker task. On average, participants took 0.166 [0.114, 0.222] s longer to react  
585 in the Speech than to the Speaker task. **C.** Mean reaction time difference between the Noise  
586 and the Clear condition. On average, participants took 0.059 [0.010, 0.113] s longer to react  
587 during the Noise vs. Clear condition. There was no task x noise interaction.

### 588 3.1.2 Reaction times

589 The reaction times analysis showed that for the speech task participants required on average  
590 0.166 [0.114, 0.222] s longer to react than for the speaker task (Figure 5). This effect is  
591 explained by the fact that VCV syllables had constant vowels and only the consonants  
592 changed within one block. Therefore, listeners had to wait for the consonant to detect a  
593 change. Whereas, for the speaker identity task the glottal pulse rate is the strongest cue, and  
594 is immediately decoded (Gaudrain et al., 2009b). The difference in reaction times between  
595 the noise and clear condition was on average 0.059 [0.010, 0.113] s. This difference showed  
596 that the noise condition required a minimal amount of extra processing time, yet this

597 difference was on average very small. Lastly, the task x noise interaction was on average  
598 0.022 s with the HPD overlapping zero  $[-0.028, 0.076]$  s), which is not a meaningful effect.

## 599 **3.2 fMRI Results**

### 600 **3.2.1 The task-dependent modulation of left vMGB was increased for recognizing** 601 **speech-in-noise in contrast to the clear speech condition**

602 We localised the left vMGB based on an independent functional localizer (Figure 6B).  
603 Following our hypothesis, there was increased BOLD response for the task  $\times$  noise interaction  
604  $[(\text{speech task/noise} - \text{speaker task/noise}) - (\text{speech task/clear} - \text{speaker task/clear})]$  in the  
605 left vMGB (Figure 6A/B). The interaction effect had a mean large effect size ranging across  
606 participants from a small effect to a very large effect ( $g^*=2.549$   $[0.211, 5.066]$ ; Figure 6C and  
607 D). The 95% HPD of the interaction effect excluded 0, indicating that this was a robust effect  
608 (Bunce and McElreath, 2017; McElreath, 2018). Simple main effect analyses showed that the  
609 direction of the interaction was as expected. The speech task/noise condition yielded higher  
610 left vMGB responses in contrast to the speaker task/noise condition, ranging from a medium  
611 to a very large effect across participants ( $g^* = 1.104$   $[0.407, 1.798]$ ; Figure 6E). Conversely,  
612 the left vMGB response difference between the speech task and speaker task in the clear  
613 condition had a small effect size ( $g^* = 0.243$   $[-0.366, 0.854]$ ; Figure 6F), ranging from a  
614 negative medium effect to a positive large effect across participants, and the HPD overlapped  
615 0.

616



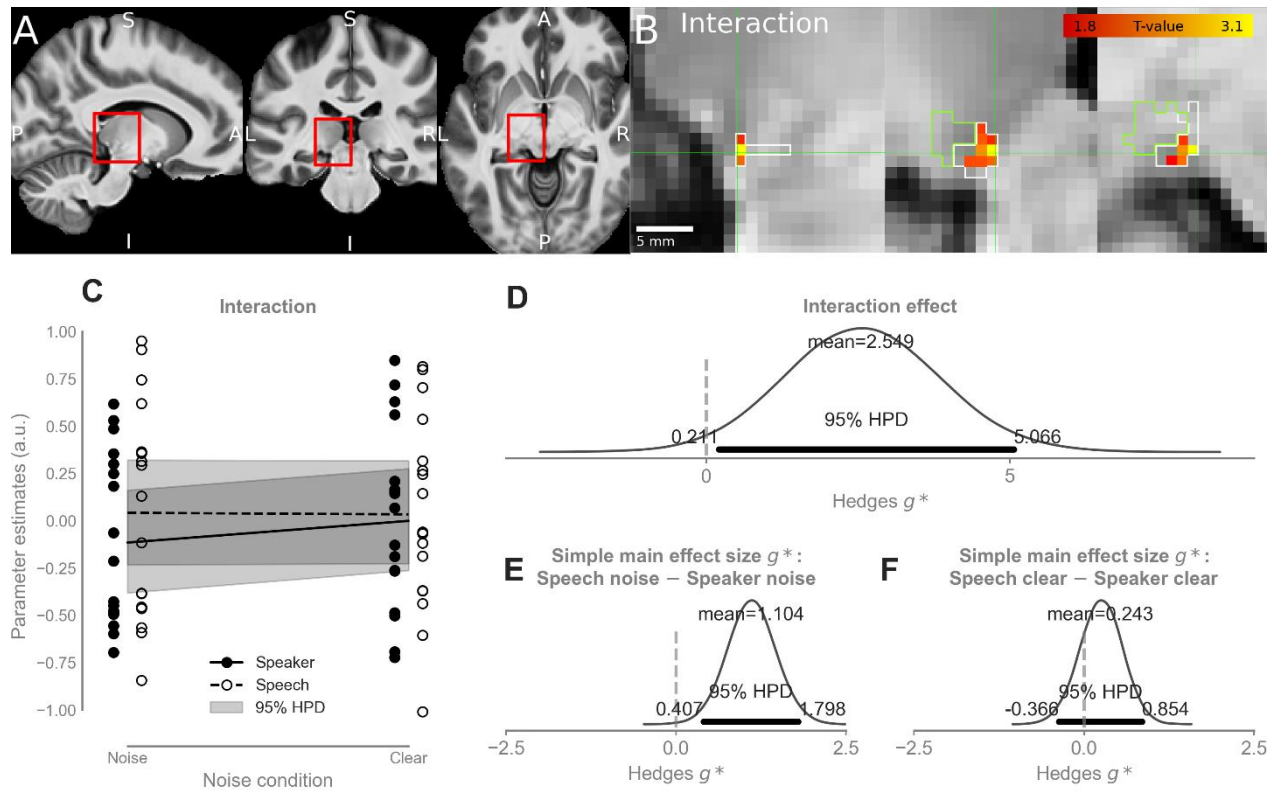

617

618 *Figure 6. fMRI results. A. The mean T1 structural image across participants in MNI space. Red*  
 619 *rectangles denote the approximate location of the left MGB and encompass the zoomed-in views*  
 620 *in B. Letters indicate anatomical terms of location: A, anterior; P, posterior; S, superior; I,*  
 621 *inferior; L, left; R, right. Panels A and B share the same orientation across columns; i.e., from left*  
 622 *to right: sagittal, coronal, and axial. B. Statistical parametric map of the interaction (yellow-*  
 623 *red colour code): (speech task/noise - speaker task/noise) - (speech task/clear - speaker*  
 624 *task/clear) overlaid on the mean structural T1 image. Crosshairs point to MNI coordinate (-11,*  
 625 *-28, -6). The white outline shows the boundary of the vMGB mask; the green boundary delineates*  
 626 *the non-tonotopic parts of the MGB. C. Parameter estimates (mean-centred) within the vMGB*  
 627 *mask. Open circles denote parameter estimates of the speech task condition; filled circles denote*  
 628 *parameter estimates of the speaker task condition. Dashed black line: the relationship between*  
 629 *noise condition (noise, clear) and parameter estimates in the speech task. Solid black line: the*

630 *relationship between noise condition (noise, clear) and parameter estimates in the speaker task.*  
631 *The shaded grey area shows the 95% HPD. **D-F** Bayesian Analysis of the parameter estimates.*  
632 ***D.** The effect size of the interaction: the effect size for the interaction effect was very large (2.549*  
633 *[0.211, 5.066]) and the HPD excluded zero (indicated by the dashed vertical line). **E.** Simple main*  
634 *effect: speech task/noise – speaker task/noise. The mean effect size was large (1.104 [0.407,*  
635 *1.798]). The HPD excluded zero. **F.** Simple main effect: speech task/clear – speaker task/clear.*  
636 *The mean effect size was small (0.243 [-0.366, 0.854]). The HPD contained zero.*

637  
638 The results showed that the task-dependent modulation of the left vMGB for the speech task  
639 was increased when participants recognised speech – speaker identity in background noise  
640 in contrast to speech – speaker identity without background noise (task × noise interaction).  
641 This finding cannot be explained by differences in stimulus input as the same stimulus  
642 material was used for the speech and the speaker task. The results are also unlikely due to  
643 differences in task difficulty between conditions, as the behavioural results showed no  
644 detectable differences in performance for the simple main effects.

645 We did not have a specific hypothesis on the right vMGB, as there is currently no indication  
646 that the task-dependent modulation in this region is behavioural relevant (von Kriegstein et  
647 al., 2008; Mihai et al., 2019) or dysfunctional in disorders associated with speech-in-noise  
648 processing difficulties (Díaz et al., 2012; Tschentscher et al., 2019). Exploring the  
649 interaction in the right vMGB revealed no interaction effect as the HPD strongly overlapped  
650 zero ( $g^* = -0.544 [-3.093, 2.459]$ ).

### 651 3.2.2 Exploratory analyses on the central nucleus of the inferior colliculus (cIC)

652 In exploratory analyses, we investigated the bilateral cIC involvement during speech  
653 processing. The reason for these exploratory analyses were studies using auditory brainstem  
654 responses (ABR) during passive listening to speech sounds that have shown that the quality  
655 of speech sound representation (i.e., as measured by the frequency following response, FFR)  
656 explains inter-individual variability in speech-in-noise recognition abilities (Chandrasekaran  
657 et al., 2009; Song et al., 2010; Schoof and Rosen, 2016; Selinger et al., 2016). These findings  
658 indicated that there might be subcortical nuclei beyond the MGB that are involved in speech-  
659 in-noise perception, potentially also sources in the auditory brainstem, particularly the IC  
660 (Chandrasekaran and Kraus, 2010b). Four previous fMRI experiments, however, have shown  
661 that there is *no* significant task-dependent modulation (i.e., higher BOLD responses for a  
662 speech in contrast to a control task on the same stimuli) of the inferior colliculus (von  
663 Kriegstein et al., 2008; Díaz et al., 2012; Mihai et al., 2019). Two of them showed a significant  
664 positive correlation between the amount of BOLD response difference between a speech and  
665 a control task in the left IC and the speech recognition performance across participants (von  
666 Kriegstein et al., 2008, experiment 1 and 2), but the others did not. Thus the role of the IC in  
667 speech recognition and speech-in-noise recognition is to date unclear. In the present data,  
668 there was a small effect of task in the left cIC (speech - speaker, left  $g^*=0.309$  [-0.286, 0.902]  
669 and right  $g^*= 0.126$  [-0.393, 0.646], however, the HPD overlapped zero. The task  $\times$  noise  
670 interaction contained no explanatory power (left:  $g^*=0.049$  [-0.103, 0.202], right:  $g^*=-0.010$   
671 [-0.136, 0.111]) and introduced overfitting. We, therefore, excluded it from the model, and  
672 the reported results were computed from the model without an interaction term.

673 The correlation between the task-dependent modulation (i.e., speech - speaker task contrast)  
674 and the speech recognition scores across participants in the left cIC was not significant in the  
675 current study ( $r=0.44$ ,  $p=0.074$ , Figure 7).

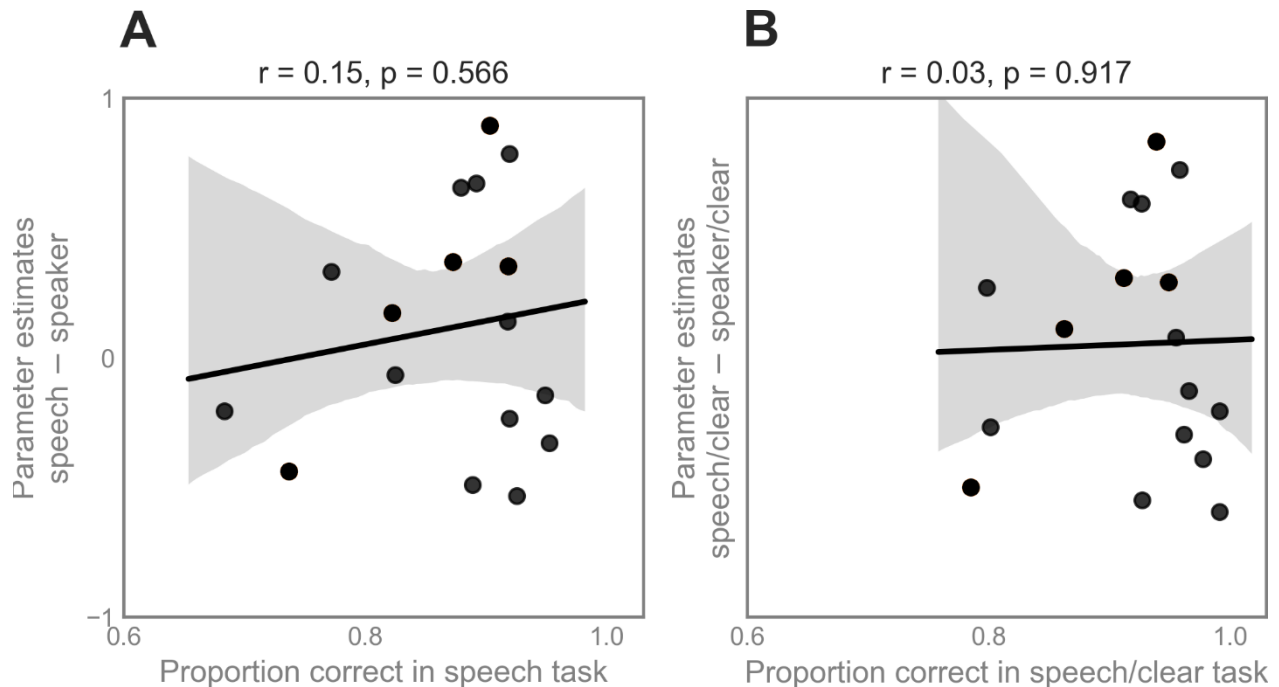

677 *Figure 7. A Correlation analysis between the parameter estimates of the contrast Speech -*  
678 *Speaker task in the left cIC and the proportion of hits in the speech task. B Correlation analysis*  
679 *between the parameter estimates of the contrast speech/clear - speaker/clear task in the left*  
680 *cIC and the proportion of hits in the speech/clear task. Most data points are close to the ceiling*  
681 *on the right of the behavioural score. For both correlations, the degrees of freedom were 16.*

682

683

## 684 **4. Discussion**

685 We showed that the task-dependent modulation for speech of the left hemispheric primary  
686 sensory thalamus (vMGB) is particularly strong when recognising speech in noisy listening  
687 conditions in contrast to conditions where the speech signal is clear. This finding confirmed  
688 our a priori hypothesis which was based on explaining speech-in-noise recognition and  
689 sensory thalamus function within a Bayesian brain framework. Exploratory analyses showed  
690 that there was no influence of noise on the responses for the contrast between speech and  
691 speaker task in the right vMGB, or in the auditory midbrain, i.e., the central nuclei of the  
692 inferior colliculi (cIC).

693 Bayesian approaches to brain function propose that the brain uses internal dynamic models  
694 to predict the trajectory of the sensory input (Knill and Pouget, 2004; Friston, 2005; Kiebel  
695 et al., 2008; Friston and Kiebel, 2009). Thus, slower dynamics of the internal dynamic model  
696 (e.g., syllable and word representations) could be encoded by auditory cerebral cortex  
697 areas (Giraud et al., 2000; Davis and Johnsrude, 2007; Hickok and Poeppel, 2007; Wang et al.,  
698 2008; Mattys et al., 2012; Price, 2012), and provide predictions about the faster dynamics of  
699 the input arriving at lower levels of the anatomic hierarchy (Kiebel et al., 2008; von  
700 Kriegstein et al., 2008). In this view, dynamic predictions modulate the response properties  
701 of the first-order sensory thalamus to optimise the early stages of speech recognition (Mihai  
702 et al., 2019). In speech processing, such a mechanism might be especially useful as the signal  
703 includes rapid dynamics, that are predictable (e.g., due to co-articulation or learned  
704 statistical regularities in words) (Saffran, 2003). In addition, speech often has to be computed  
705 online under conditions of (sensory) uncertainty. Uncertainty refers to the limiting reliability

706 of sensory information about the world (Knill and Pouget, 2004). Examples include the  
707 density of hair cells in the cochlea that limit frequency resolution, the neural noise-induced  
708 at different processing stages, or – as was the case in the current study – background  
709 environmental noise that surrounds the stimulus of interest. An internal generative model  
710 about the fast sensory dynamics (Knill and Pouget, 2004; Friston, 2005; Kiebel et al., 2008;  
711 Friston and Kiebel, 2009) of speech could lead to enhanced stimulus representation in the  
712 subcortical sensory pathway and by that provides improved signal quality to the auditory  
713 cortex. Such a mechanism would result in more efficient processing when taxing conditions,  
714 such as background noise, confront the perceptual system. The interaction between task and  
715 noise in the left vMGB is in congruence with such a mechanism. It shows that the task-  
716 dependent modulation of the left vMGB is increased in a situation with high sensory  
717 uncertainty in contrast to the situation with lower sensory uncertainty. Although the results  
718 are in accordance with the Bayesian brain hypothesis, the study was not meant to test  
719 directly whether predictive coding is used in the auditory pathway. To test this it would be  
720 necessary to manipulate predictability of the stimuli (Tabas et al., 2020).

721 Both the speech task and the speaker task required attention to the stimuli. Attention can  
722 interact to provide a better decoding of the stimuli we choose to attend to (Schröger et al.,  
723 2015), and can optimize predictions of incoming signals (Smout et al., 2019) resulting in a  
724 top-down and bottom up signal integration (Gordon et al., 2019). Attention can be formulated  
725 in a predictive coding account (Ransom et al., 2017), for example, it could result in increased  
726 precision on the prediction. It is to date an open question whether the task-dependent  
727 modulation observed for speech recognition in the present and previous studies in sensory  
728 thalamic nuclei (von Kriegstein et al., 2008; Díaz et al., 2012, 2018; Mihai et al., 2019) operate

729 through the same mechanisms as attentional modulation (O'Connor et al., 2002; Schneider  
730 and Kastner, 2009; Schneider, 2011; Ling et al., 2015)

731 Speech-in-noise recognition abilities are thought to rely (i) on additional cognitive resources  
732 (reviewed in Peelle, 2018) and (ii) on the fidelity of speech sound representation in  
733 brainstem nuclei, as measured by auditory brainstem response recordings (reviewed in  
734 Anderson and Kraus, 2010). For example, studies investigating speech-in-noise recognition  
735 at the level of the cerebral cortex found networks that include areas pertaining to linguistic,  
736 attentional, working memory, and motor planning (Salvi et al., 2002; Scott et al., 2004; Bishop  
737 and Miller, 2008; Wong et al., 2008). These results suggested that during speech recognition  
738 in challenging listening conditions additional cerebral cortex regions are recruited that likely  
739 complement the processing of sound in the core speech network (reviewed in Peelle, 2018).  
740 The present study showed that besides the additional cerebral cortex region recruitment, a  
741 specific part of the sensory pathway is also modulated during speech-in-noise recognition:  
742 the left vMGB.

743 Auditory brainstem response (ABR) recordings during passive listening to speech sounds  
744 have shown that the quality of speech sound representation (i.e., as measured by the  
745 frequency following response, FFR) explains inter-individual variability in speech-in-noise  
746 recognition abilities (Chandrasekaran et al., 2009; Song et al., 2010; Schoof and Rosen, 2016;  
747 Selinger et al., 2016) and can be modulated by attention to speech in situations with two  
748 competing speech streams (Forte et al., 2017). It is difficult to directly relate the results of  
749 these FFR studies on participants with varying speech-in-noise recognition abilities  
750 (Chandrasekaran et al., 2009; Song et al., 2010; Schoof and Rosen, 2016; Selinger et al., 2016)  
751 to the studies on task-dependent modulation of structures in the subcortical sensory

752 pathway (von Kriegstein et al., 2008; Díaz et al., 2012; Mihai et al., 2019): they involve very  
753 different measurement modalities and the FFR studies focus mostly on speech-in-noise  
754 perception in passive listening designs. One major candidate for the FFR source is the inferior  
755 colliculus. Particularly for speech, the FFR, as recorded by EEG, seems to be dominated by  
756 brainstem and auditory nerve sources (reviewed in Chandrasekaran et al., 2014; Bidelman,  
757 2018). The results of the present study, however, do not provide evidence for a specific  
758 involvement of the inferior colliculus when recognising speech-in-noise. The choice of  
759 syllables for the speech task emphasises predictions at the phonetic level. One possibility is  
760 that task-dependent modulation of the left MGB in conditions with high sensory uncertainty,  
761 might be particularly relevant for such processing at the phonetic level as the MGB might be  
762 optimised for this type of fast-varying information (Giraud et al., 2000; von Kriegstein et al.,  
763 2008). Whether the inferior colliculus might play a different role in speech-in-noise  
764 processing is an open question.

765 We speculate that the task-dependent vMGB modulation might be a result of feedback from  
766 cerebral cortex areas. The strength of the feedback could be enhanced when speech has to be  
767 recognised in background noise. The task-dependent feedback may emanate directly from  
768 primary auditory or association cortices, or indirectly via other structures such as the  
769 reticular nucleus with its inhibitory connections to the MGB (Rouiller and de Ribaupierre,  
770 1985). Feedback cortico-thalamic projections from layer 6 in A1 to the vMGB, but also from  
771 association cortices such as the motion-sensitive planum temporale (Tschentscher et al.,  
772 2019), may modulate information ascending through the lemniscal pathway, rather than  
773 convey information to the vMGB (Llano and Sherman, 2008; Lee, 2013).



774 Difficulties in understanding speech-in-noise accompany developmental disorders like  
775 autism spectrum disorder, developmental dyslexia, and auditory processing  
776 disorders (Alcántara et al., 2004; Chandrasekaran et al., 2009; Wong et al., 2009; Ziegler et  
777 al., 2009; Bellis and Bellis, 2015; Schoof and Rosen, 2016; Schelinski and Kriegstein, 2019).  
778 In the case of developmental dyslexia, previous studies have found that developmental  
779 dyslexics do not have the same amount of task-dependent modulation of the left MGB for  
780 speech recognition as controls (Díaz et al., 2012) and also do not display the same context-  
781 sensitivity of brainstem responses to speech sounds as typical readers (Chandrasekaran et  
782 al., 2009). In addition, diffusion-weighted imaging studies have found reduced structural  
783 connections between the MGB and cerebral cortex (i.e., the motion-sensitive planum  
784 temporale) of the left hemisphere in developmental dyslexics compared to controls (see  
785 Müller-Axt et al., 2017 for similar findings in the visual modality; Tschentscher et al., 2019).  
786 These altered structures might account for the difficulties in understanding speech-in-noise  
787 in developmental dyslexia. Consider distinguishing speech sounds like “dad” and “had” in a  
788 busy marketplace. For typically developed individuals, vMGB responses might be modulated  
789 to optimally encode the subtle but predictable spectrotemporal cues that enable the explicit  
790 recognition of speech sounds. This modulation would enhance speech recognition. For  
791 developmental dyslexics, however, this vMGB modulation may be impaired and may explain  
792 their difficulty with speech perception in noise (Boets et al., 2007; Ziegler et al., 2009; Díaz et  
793 al., 2012).

794 In conclusion, the results presented here suggest that the left vMGB is particularly involved  
795 in decoding speech as opposed to identifying the speaker if there is background noise. This  
796 enhancement may be due to top-down processes that act upon subcortical sensory

797 structures, such as the primary auditory thalamus, to better predict dynamic incoming  
798 signals in conditions with high sensory uncertainty.

## 799 **References**

- 800 Anderson, Samira, and Nina Kraus. 2010. "Sensory-Cognitive Interaction in the Neural  
801 Encoding of Speech in Noise: A Review". *Journal of the American Academy of*  
802 *Audiology* 21 (9). American Academy of AAdams RA, Shipp S, Friston KJ (2013)  
803 Predictions not commands: active inference in the motor system. *Brain Struct Funct*  
804 218:611–643.
- 805 Adank P (2012) The neural bases of difficult speech comprehension and speech production: Two  
806 Activation Likelihood Estimation (ALE) meta-analyses. *Brain and Language* 122:42–54.
- 807 Alavash M, Tune S, Obleser J (2019) Modular reconfiguration of an auditory control brain  
808 network supports adaptive listening behavior. *PNAS* 116:660–669.
- 809 Alcántara JI, Weisblatt EJL, Moore BCJ, Bolton PF (2004) Speech-in-noise perception in high-  
810 functioning individuals with autism or Asperger's syndrome. *Journal of Child Psychology*  
811 *and Psychiatry* 45:1107–1114.
- 812 Amrhein V, Greenland S, McShane B (2019) Scientists rise up against statistical significance.  
813 *Nature* 567:305.
- 814 Anderson AA (2019) Assessing Statistical Results: Magnitude, Precision, and Model  
815 Uncertainty. *The American Statistician* 73:118–121.
- 816 Anderson S, Kraus N (2010) Sensory-Cognitive Interaction in the Neural Encoding of Speech in  
817 Noise: A Review. *Journal of the American Academy of Audiology* 21:575–585.
- 818 Andersson JLR, Hutton C, Ashburner J, Turner R, Friston K (2001) Modeling Geometric  
819 Deformations in EPI Time Series. *NeuroImage* 13:903–919.
- 820 Avants BB, Epstein CL, Grossman M, Gee JC (2008) Symmetric diffeomorphic image  
821 registration with cross-correlation: Evaluating automated labeling of elderly and  
822 neurodegenerative brain. *Medical Image Analysis* 12:26–41.
- 823 Banno H, Hata H, Morise M, Takahashi T, Irino T, Kawahara H (2007) Implementation of  
824 realtime STRAIGHT speech manipulation system: Report on its first implementation.  
825 *Acoustical Science and Technology* 28:140–146.
- 826 Baron-Cohen S, Wheelwright S, Skinner R, Martin J, Clubley E (2001) The Autism-Spectrum  
827 Quotient (AQ): Evidence from Asperger Syndrome/High-Functioning Autism, Males and  
828 Females, Scientists and Mathematicians. *J Autism Dev Disord* 31:5–17.

- 829 Bastos AM, Usrey WM, Adams RA, Mangun GR, Fries P, Friston KJ (2012) Canonical  
830 Microcircuits for Predictive Coding. *Neuron* 76:695–711.
- 831 Bellis TJ, Bellis JD (2015) Central auditory processing disorders in children and adults. *Handb*  
832 *Clin Neurol* 129:537–556.
- 833 Best V, Gallun FJ, Carlile S, Shinn-Cunningham BG (2007) Binaural interference and auditory  
834 grouping. *The Journal of the Acoustical Society of America* 121:1070–1076.
- 835 Bidelman GM (2018) Subcortical sources dominate the neuroelectric auditory frequency-  
836 following response to speech. *NeuroImage* 175:56–69.
- 837 Bishop CW, Miller LM (2008) A Multisensory Cortical Network for Understanding Speech in  
838 Noise. *Journal of Cognitive Neuroscience* 21:1790–1804.
- 839 Boets B, Wouters J, van Wieringen A, Ghesquière P (2007) Auditory processing, speech  
840 perception and phonological ability in pre-school children at high-risk for dyslexia: A  
841 longitudinal study of the auditory temporal processing theory. *Neuropsychologia*  
842 45:1608–1620.
- 843 Brainard DH (1997) The Psychophysics Toolbox. *Spatial Vision* 10:433–436.
- 844 Bregman AS (1994) Auditory scene analysis: The perceptual organization of sound. MIT press.
- 845 Bronkhorst AW (2015) The cocktail-party problem revisited: early processing and selection of  
846 multi-talker speech. *Atten Percept Psychophys* 77:1465–1487.
- 847 Bunce JA, McElreath R (2017) Interethnic Interaction, Strategic Bargaining Power, and the  
848 Dynamics of Cultural Norms. *Hum Nat* 28:434–456.
- 849 Carhart R, Johnson C, Goodman J (1975) Perceptual masking of spondees by combinations of  
850 talkers. *The Journal of the Acoustical Society of America* 58:S35–S35.
- 851 Chandrasekaran B, Hornickel J, Skoe E, Nicol T, Kraus N (2009) Context-dependent encoding in  
852 the human auditory brainstem relates to hearing speech in noise: Implications for  
853 developmental dyslexia. *Neuron* 64:311–319.
- 854 Chandrasekaran B, Kraus N (2010a) Music, Noise-Exclusion, and Learning. *MUSIC PERCEPT*  
855 27:297–306.
- 856 Chandrasekaran B, Kraus N (2010b) The scalp-recorded brainstem response to speech: Neural  
857 origins and plasticity. *Psychophysiology* 47:236–246.
- 858 Chandrasekaran B, Skoe E, Kraus N (2014) An Integrative Model of Subcortical Auditory  
859 Plasticity. *Brain Topogr* 27:539–552.
- 860 Chen JJ (2003) COMMUNICATING COMPLEX INFORMATION: THE INTERPRETATION  
861 OF STATISTICAL INTERACTION IN MULTIPLE LOGISTIC REGRESSION  
862 ANALYSIS. *Am J Public Health* 93:1376–1377.

- 863 Cherry EC (1953) Some Experiments on the Recognition of Speech, with One and with Two  
864 Ears. *The Journal of the Acoustical Society of America* 25:975–979.
- 865 Cohen J (1988) *Statistical Power Analysis for the Behavioral Sciences*, 2nd ed. Lawrence  
866 Erlbaum Associates.
- 867 Davis KA (2005) Spectral Processing in the Inferior Colliculus. In: *International Review of*  
868 *Neurobiology*, pp 169–205. Elsevier. Available at:  
869 <https://linkinghub.elsevier.com/retrieve/pii/S0074774205700064> [Accessed April 3,  
870 2020].
- 871 Davis MH, Johnsrude IS (2007) Hearing speech sounds: Top-down influences on the interface  
872 between audition and speech perception. *Hearing Research* 229:132–147.
- 873 Denckla MB, Rudel RG (1976) Rapid ‘automatized’ naming (R.A.N.): Dyslexia differentiated  
874 from other learning disabilities. *Neuropsychologia* 14:471–479.
- 875 Díaz B, Blank H, von Kriegstein K (2018) Task-dependent modulation of the visual sensory  
876 thalamus assists visual-speech recognition. *NeuroImage* 178:721–734.
- 877 Díaz B, Hintz F, Kiebel SJ, Kriegstein K von (2012) Dysfunction of the auditory thalamus in  
878 developmental dyslexia. *PNAS* 109:13841–13846.
- 879 Feldman H, Friston K (2010) Attention, Uncertainty, and Free-Energy. *Front Hum Neurosci* 4  
880 Available at: <https://www.frontiersin.org/articles/10.3389/fnhum.2010.00215/full>  
881 [Accessed March 22, 2019].
- 882 Fischl B, Salat DH, van der Kouwe AJW, Makris N, Ségonne F, Quinn BT, Dale AM (2004)  
883 Sequence-independent segmentation of magnetic resonance images. *NeuroImage* 23:S69–  
884 S84.
- 885 Forte AE, Etard O, Reichenbach T (2017) The human auditory brainstem response to running  
886 speech reveals a subcortical mechanism for selective attention Shinn-Cunningham BG,  
887 ed. *eLife* 6:e27203.
- 888 Friston K (2005) A theory of cortical responses. *Philosophical Transactions of the Royal Society*  
889 *of London B: Biological Sciences* 360:815–836.
- 890 Friston K, Kiebel S (2009) Predictive coding under the free-energy principle. *Philosophical*  
891 *Transactions of the Royal Society of London B: Biological Sciences* 364:1211–1221.
- 892 Gaudrain E, Li S, Ban VS, Patterson RD (2009a) The Role of Glottal Pulse Rate and Vocal Tract  
893 Length in the Perception of Speaker Identity. *Interspeech-2009*:148–151.
- 894 Gaudrain E, Li S, Ban VS, Patterson RD (2009b) The Role of Glottal Pulse Rate and Vocal Tract  
895 Length in the Perception of Speaker Identity. In, pp 148–151. Brighton, UK.
- 896 Gelman A, Carlin JB, Stern HS, Dunson DB, Vehtari A, Rubin DB, Carlin JB, Stern HS, Dunson  
897 DB, Vehtari A, Rubin DB (2013) *Bayesian Data Analysis*. Chapman and Hall/CRC.

- 898 Available at: <https://www.taylorfrancis.com/books/9781439898208> [Accessed April 1,  
899 2019].
- 900 Gelman A, Hill J (2006) Data analysis using regression and multilevel/hierarchical models.  
901 Cambridge university press.
- 902 Giraud A-L, Lorenzi C, Ashburner J, Wable J, Johnsrude I, Frackowiak R, Kleinschmidt A  
903 (2000) Representation of the Temporal Envelope of Sounds in the Human Brain. *Journal*  
904 *of Neurophysiology* 84:1588–1598.
- 905 Gordon N, Koenig-Robert R, Tsuchiya N, van Boxtel JJ, Hohwy J (2017) Neural markers of  
906 predictive coding under perceptual uncertainty revealed with Hierarchical Frequency  
907 Tagging. *eLife* 6 Available at: <https://elifesciences.org/articles/22749> [Accessed March  
908 22, 2019].
- 909 Gordon N, Tsuchiya N, Koenig-Robert R, Hohwy J (2019) Expectation and attention increase the  
910 integration of top-down and bottom-up signals in perception through different pathways.  
911 *PLOS Biology* 17:1–28.
- 912 Gorgolewski K, Burns CD, Madison C, Clark D, Halchenko YO, Waskom ML, Ghosh SS (2011)  
913 Nipype: A Flexible, Lightweight and Extensible Neuroimaging Data Processing  
914 Framework in Python. *Front Neuroinform* 5 Available at:  
915 <https://www.frontiersin.org/articles/10.3389/fninf.2011.00013/full> [Accessed April 2,  
916 2019].
- 917 Griswold MA, Jakob PM, Heidemann RM, Nittka M, Jellus V, Wang J, Kiefer B, Haase A  
918 (2002) Generalized autocalibrating partially parallel acquisitions (GRAPPA). *Magnetic*  
919 *Resonance in Medicine* 47:1202–1210.
- 920 Groen WB, van Orsouw L, Huurne N ter, Swinkels S, van der Gaag R-J, Buitelaar JK, Zwiers  
921 MP (2009) Intact Spectral but Abnormal Temporal Processing of Auditory Stimuli in  
922 Autism. *J Autism Dev Disord* 39:742–750.
- 923 Gupta S, Bhurchandi KM, Keskar AG (2016) An efficient noise-robust automatic speech  
924 recognition system using artificial neural networks. In: 2016 International Conference on  
925 Communication and Signal Processing (ICCSP), pp 1873–1877.
- 926 Han X, Fischl B (2007) Atlas Renormalization for Improved Brain MR Image Segmentation  
927 Across Scanner Platforms. *IEEE Transactions on Medical Imaging* 26:479–486.
- 928 Hedges LV, Olkin I (1985) *Statistical Methods for Meta-Analysis*. Elsevier Science. Available at:  
929 <https://books.google.de/books?id=brNpAAAAMAAJ>.
- 930 Hesselmann G, Sadaghiani S, Friston KJ, Kleinschmidt A (2010) Predictive Coding or Evidence  
931 Accumulation? False Inference and Neuronal Fluctuations. *PLOS ONE* 5:e9926.
- 932 Hickok G, Poeppel D (2007) The cortical organization of speech processing. *Nature Reviews*  
933 *Neuroscience* 8:393–402.

- 934 Hoffman MD, Gelman A (2014) The No-U-Turn sampler: adaptively setting path lengths in  
935 Hamiltonian Monte Carlo. *Journal of Machine Learning Research* 15:1593–1623.
- 936 Huang Y, Rao RPN (2011) Predictive coding. *WIREs Cogn Sci* 2:580–593.
- 937 Iliadou V (Vivian) et al. (2017) A European Perspective on Auditory Processing Disorder-  
938 Current Knowledge and Future Research Focus. *Front Neurol* 8 Available at:  
939 <https://www.frontiersin.org/articles/10.3389/fneur.2017.00622/full> [Accessed June 11,  
940 2019].
- 941 Jezzard P, Balaban RS (1995) Correction for geometric distortion in echo planar images from B0  
942 field variations. *Magnetic Resonance in Medicine* 34:65–73.
- 943 Jordan MI ed. (1998) *Learning in Graphical Models*. Springer Netherlands. Available at:  
944 <https://www.springer.com/gp/book/9780792350170> [Accessed April 2, 2019].
- 945 Kasper L, Bollmann S, Diaconescu AO, Hutton C, Heinzle J, Iglesias S, Hauser TU, Sebold M,  
946 Manjaly Z-M, Pruessmann KP, Stephan KE (2017) The PhysIO Toolbox for Modeling  
947 Physiological Noise in fMRI Data. *Journal of Neuroscience Methods* 276:56–72.
- 948 Kiebel SJ, Daunizeau J, Friston KJ (2008) A Hierarchy of Time-Scales and the Brain. *PLOS*  
949 *Computational Biology* 4:e1000209.
- 950 Knill DC, Pouget A (2004) The Bayesian brain: the role of uncertainty in neural coding and  
951 computation. *Trends in Neurosciences* 27:712–719.
- 952 Kreitewolf J, Gaudrain E, von Kriegstein K (2014) A neural mechanism for recognizing speech  
953 spoken by different speakers. *NeuroImage* 91:375–385.
- 954 Lauritzen SL, Dawid AP, Larsen BN, Leimer H-G (1990) Independence properties of directed  
955 markov fields. *Networks* 20:491–505.
- 956 Lee CC (2013) Thalamic and cortical pathways supporting auditory processing. *Brain and*  
957 *Language* 126:22–28.
- 958 Lewandowski D, Kurowicka D, Joe H (2009) Generating random correlation matrices based on  
959 vines and extended onion method. *Journal of Multivariate Analysis* 100:1989–2001.
- 960 Ling S, Pratte MS, Tong F (2015) Attention alters orientation processing in the human lateral  
961 geniculate nucleus. *Nat Neurosci* 18:496–498.
- 962 Llano DA, Sherman SM (2008) Evidence for nonreciprocal organization of the mouse auditory  
963 thalamocortical-corticothalamic projection systems. *Journal of Comparative Neurology*  
964 507:1209–1227.
- 965 Marques JP, Kober T, Krueger G, van der Zwaag W, Van de Moortele P-F, Gruetter R (2010)  
966 MP2RAGE, a self bias-field corrected sequence for improved segmentation and T1-  
967 mapping at high field. *NeuroImage* 49:1271–1281.



- 968 Mattys SL, Davis MH, Bradlow AR, Scott SK (2012) Speech recognition in adverse conditions:  
969 A review. *Language and Cognitive Processes* 27:953–978.
- 970 McElreath R (2018) *Statistical Rethinking : A Bayesian Course with Examples in R and Stan*.  
971 Chapman and Hall/CRC. Available at:  
972 <https://www.taylorfrancis.com/books/9781315362618> [Accessed April 1, 2019].
- 973 Mihai PG, Moerel M, de Martino F, Trampel R, Kiebel S, von Kriegstein K (2019) Modulation  
974 of tonotopic ventral medial geniculate body is behaviorally relevant for speech  
975 recognition. *eLife* 8:e44837.
- 976 Moore BCJ, Peters RW, Glasberg BR (1985) Thresholds for the detection of inharmonicity in  
977 complex tones. *The Journal of the Acoustical Society of America* 77:1861–1867.
- 978 Müller-Axt C, Anwender A, von Kriegstein K (2017) Altered Structural Connectivity of the Left  
979 Visual Thalamus in Developmental Dyslexia. *Current Biology* 27:3692-3698.e4.
- 980 Mumford D (1992) On the computational architecture of the neocortex. *Biol Cybern* 66:241–251.
- 981 O’Connor DH, Fukui MM, Pinsk MA, Kastner S (2002) Attention modulates responses in the  
982 human lateral geniculate nucleus. *Nature Neuroscience* 5:1203–1209.
- 983 Peelle JE (2018) Listening Effort: How the Cognitive Consequences of Acoustic Challenge Are  
984 Reflected in Brain and Behavior. *Ear and Hearing* 39:204.
- 985 Price CJ (2012) A review and synthesis of the first 20years of PET and fMRI studies of heard  
986 speech, spoken language and reading. *NeuroImage* 62:816–847.
- 987 Ransom M, Fazelpour S, Mole C (2017) Attention in the predictive mind. *Consciousness and*  
988 *Cognition* 47:99–112.
- 989 Rouiller EM, de Ribaupierre F (1985) Origin of afferents to physiologically defined regions of  
990 the medial geniculate body of the cat: ventral and dorsal divisions. *Hearing Research*  
991 19:97–114.
- 992 Saffran JR (2003) *Statistical Language Learning: Mechanisms and Constraints*. *Curr Dir Psychol*  
993 *Sci* 12:110–114.
- 994 Salvatier J, Wiecki TV, Fonnesbeck C (2016) Probabilistic programming in Python using  
995 PyMC3. *PeerJ Comput Sci* 2:e55.
- 996 Salvi RJ, Lockwood AH, Frisina RD, Coad ML, Wack DS, Frisina DR (2002) PET imaging of  
997 the normal human auditory system: responses to speech in quiet and in background noise.  
998 *Hearing Research* 170:96–106.
- 999 Sayles M, Winter IM (2008) Ambiguous Pitch and the Temporal Representation of Inharmonic  
1000 Iterated Rippled Noise in the Ventral Cochlear Nucleus. *J Neurosci* 28:11925–11938.

- 1001 Scharenborg O (2007) Reaching over the gap: A review of efforts to link human and automatic  
1002 speech recognition research. *Speech Communication* 49:336–347.
- 1003 Schelinski S, Kriegstein K von (2019) Speech-in-noise recognition and the relation to vocal pitch  
1004 perception in adults with autism spectrum disorder and typical development. *PsyarXiv*  
1005 Available at: <https://psyarxiv.com/u84vd/> [Accessed October 3, 2019].
- 1006 Schneider KA (2011) Subcortical Mechanisms of Feature-Based Attention. *Journal of*  
1007 *Neuroscience* 31:8643–8653.
- 1008 Schneider KA, Kastner S (2009) Effects of Sustained Spatial Attention in the Human Lateral  
1009 Geniculate Nucleus and Superior Colliculus. *Journal of Neuroscience* 29:1784–1795.
- 1010 Schneider W, Schlagmüller M, Ennemoser M (2007) LGVT 6-12: Lesegeschwindigkeits-und-  
1011 verständnistest für die Klassen 6-12. Hogrefe Göttingen.
- 1012 Schoof T, Rosen S (2016) The Role of Age-Related Declines in Subcortical Auditory Processing  
1013 in Speech Perception in Noise. *JARO* 17:441–460.
- 1014 Schröger E, Marzecová A, SanMiguel I (2015) Attention and prediction in human audition: a  
1015 lesson from cognitive psychophysiology. *Eur J Neurosci* 41:641–664.
- 1016 Scott SK, Rosen S, Wickham L, Wise RJS (2004) A positron emission tomography study of the  
1017 neural basis of informational and energetic masking effects in speech perception. *The*  
1018 *Journal of the Acoustical Society of America* 115:813–821.
- 1019 Selinger L, Zarnowiec K, Via M, Clemente IC, Escera C (2016) Involvement of the Serotonin  
1020 Transporter Gene in Accurate Subcortical Speech Encoding. *J Neurosci* 36:10782–10790.
- 1021 Semrud-Clikeman M, Guy K, Griffin JD, Hynd GW (2000) Rapid Naming Deficits in Children  
1022 and Adolescents with Reading Disabilities and Attention Deficit Hyperactivity Disorder.  
1023 *Brain and Language* 74:70–83.
- 1024 Seth A, Friston K (2016) Active interoceptive inference and the emotional brain. *Philosophical*  
1025 *Transactions of the Royal Society B: Biological Sciences* 371:20160007.
- 1026 Shinn-Cunningham BG, Best V (2008) Selective Attention in Normal and Impaired Hearing.  
1027 *Trends in Amplification* 12:283–299.
- 1028 Shipp S, Adams RA, Friston KJ (2013) Reflections on agranular architecture: predictive coding  
1029 in the motor cortex. *Trends in Neurosciences* 36:706–716.
- 1030 Smith SM, Jenkinson M, Woolrich MW, Beckmann CF, Behrens TEJ, Johansen-Berg H,  
1031 Bannister PR, De Luca M, Drobnjak I, Flitney DE, Niazy RK, Saunders J, Vickers J,  
1032 Zhang Y, De Stefano N, Brady JM, Matthews PM (2004) Advances in functional and  
1033 structural MR image analysis and implementation as FSL. *NeuroImage* 23:S208–S219.
- 1034 Smout CA, Tang MF, Garrido MI, Mattingley JB (2019) Attention promotes the neural encoding  
1035 of prediction errors. *PLOS Biology* 17:e2006812.



- 1036 Song JH, Skoe E, Banai K, Kraus N (2010) Perception of Speech in Noise: Neural Correlates.  
1037 Journal of Cognitive Neuroscience 23:2268–2279.
- 1038 Srinivasan MV, Laughlin SB, Dubs A (1982) Predictive coding: a fresh view of inhibition in the  
1039 retina. Proceedings of the Royal Society of London Series B Biological Sciences  
1040 216:427–459.
- 1041 Tabas A, Mihai G, Kiebel S, Trampel R, Kriegstein K von (2020) Predictive coding underlies  
1042 adaptation in the subcortical sensory pathway. arXiv preprint Available at:  
1043 <https://arxiv.org/abs/2003.11328v1>.
- 1044 Tschentscher N, Ruisinger A, Blank H, Díaz B, Kriegstein K von (2019) Reduced Structural  
1045 Connectivity Between Left Auditory Thalamus and the Motion-Sensitive Planum  
1046 Temporale in Developmental Dyslexia. J Neurosci 39:1720–1732.
- 1047 Uttl B (2005) Measurement of Individual Differences: Lessons From Memory Assessment in  
1048 Research and Clinical Practice. Psychol Sci 16:460–467.
- 1049 Van de Cruys S, Evers K, Van der Hallen R, Van Eylen L, Boets B, de-Wit L, Wagemans J  
1050 (2014) Precise minds in uncertain worlds: Predictive coding in autism. Psychological  
1051 Review 121:649–675.
- 1052 von Kriegstein K, Patterson RD, Griffiths TD (2008) Task-Dependent Modulation of Medial  
1053 Geniculate Body Is Behaviorally Relevant for Speech Recognition. Current Biology  
1054 18:1855–1859.
- 1055 Wang X, Lu T, Bendor D, Bartlett E (2008) Neural coding of temporal information in auditory  
1056 thalamus and cortex. Neuroscience 154:294–303.
- 1057 Wong PCM, Jin JX, Gunasekera GM, Abel R, Lee ER, Dhar S (2009) Aging and cortical  
1058 mechanisms of speech perception in noise. Neuropsychologia 47:693–703.
- 1059 Wong PCM, Uppunda, Ajith K., Parrish, Todd B., Dhar, Sumitrajit (2008) Cortical Mechanisms  
1060 of Speech Perception in Noise. Journal of Speech, Language, and Hearing Research  
1061 51:1026–1041.
- 1062 Yu AJ, Dayan P (2005) Uncertainty, Neuromodulation, and Attention. Neuron 46:681–692.
- 1063 Ziegler JC, Pech-Georgel C, George F, Lorenzi C (2009) Speech-perception-in-noise deficits in  
1064 dyslexia. Developmental Science 12:732–745.
- 1065
